# Supplementary material for: NHC–Zn alkyl catalyzed cross-dehydrocoupling of amines and silanes
Source: Royal Society of Chemistry journal article supplement (doi:10.1039/d3ob00453h), 2023-01-01
Supplement: d3ob00453h1.pdf [file d3ob00453h1.pdf]

## *Electronic Supporting Information*

### **NHC- Zn alkyl catalyzed cross-dehydrocoupling of amines and silanes**

#### **Table of Contents**

**TS1.** Crystallographic data and refinement parameters of **2c**, **3** and **4**.

**FS1.** <sup>1</sup>H NMR spectrum (THF-*d*<sub>8</sub>, 300 MHz, 25 °C) of complex **3**.

**FS2.** <sup>13</sup>C NMR spectrum (THF-*d*<sub>8</sub>, 75 MHz, 25 °C) of complex **3**.

**FS3.** <sup>1</sup>H NMR spectrum (C<sub>6</sub>D<sub>6</sub>, 300 MHz, 25 °C) of complex **4**.

**FS4.** <sup>13</sup>C NMR spectrum (C<sub>6</sub>D<sub>6</sub>, 75 MHz, 25 °C) of complex **4**.

**FS5.** <sup>1</sup>H NMR spectrum (CDCl<sub>3</sub>, 400 MHz, 25 °C) of complex **1a**.

**FS6.** <sup>1</sup>H NMR spectrum (CDCl<sub>3</sub>, 400 MHz, 25 °C) of complex **1b**.

**FS7.** <sup>1</sup>H NMR spectrum (CDCl<sub>3</sub>, 400 MHz, 25 °C) of complex **1c**.

**FS8.** <sup>1</sup>H NMR spectrum (CDCl<sub>3</sub>, 400 MHz, 25 °C) of complex **1d**.

**FS9.** <sup>1</sup>H NMR spectrum (CDCl<sub>3</sub>, 400 MHz, 25 °C) of complex **1e**.

**FS10.** <sup>1</sup>H NMR spectrum (CDCl<sub>3</sub>, 400 MHz, 25 °C) of complex **1f**.

**FS11.** <sup>1</sup>H NMR spectrum (CDCl<sub>3</sub>, 400 MHz, 25 °C) of complex **1g**.

**FS12.** <sup>1</sup>H NMR spectrum (CDCl<sub>3</sub>, 400 MHz, 25 °C) of complex **1h**.

**FS13.** <sup>1</sup>H NMR spectrum (CDCl<sub>3</sub>, 400 MHz, 25 °C) of complex **1i**.

**FS14.** <sup>1</sup>H NMR spectrum (CDCl<sub>3</sub>, 400 MHz, 25 °C) of complex **2a**.

**FS15.** <sup>1</sup>H NMR spectrum (CDCl<sub>3</sub>, 400 MHz, 25 °C) of complex **2b**.

**FS16.** <sup>1</sup>H NMR spectrum (CDCl<sub>3</sub>, 400 MHz, 25 °C) of complex **2c**.

**FS17.** <sup>1</sup>H NMR spectrum (CDCl<sub>3</sub>, 400 MHz, 25 °C K) of complex **2d**.

**FS18.** <sup>1</sup>H NMR spectrum (CDCl<sub>3</sub>, 400 MHz, 25 °C) of complex **2e**.

**FS19.** <sup>1</sup>H NMR spectrum (CDCl<sub>3</sub>, 400 MHz, 25 °C) of complex **2f**.

**FS20.** <sup>13</sup>C NMR spectrum (CDCl<sub>3</sub>, 100 MHz, 25 °C) of complex **2f**.

**FS21.** <sup>1</sup>H NMR spectrum (CDCl<sub>3</sub>, 400 MHz, 25 °C) of complex **2g**.

**FS22.** <sup>13</sup>C NMR spectrum (CDCl<sub>3</sub>, 100 MHz, 25 °C) of complex **2g**.

**FS23.** <sup>1</sup>H NMR spectrum (CDCl<sub>3</sub>, 400 MHz, 25 °C) of complex **2h**.

- FS24.**  $^{13}\text{C}$  NMR spectrum ( $\text{CDCl}_3$ , 100 MHz, 25 °C) of complex **2h**.
- FS25.**  $^1\text{H}$  NMR spectrum ( $\text{CDCl}_3$ , 400 MHz, 25 °C) of complex **2i**.
- FS26.**  $^{13}\text{C}$  NMR spectrum ( $\text{CDCl}_3$ , 100 MHz, 25 °C) of complex **2i**.
- FS27.**  $^1\text{H}$  NMR spectrum ( $\text{CDCl}_3$ , 400 MHz, 25 °C) of complex **2j**.
- FS28.**  $^{13}\text{C}$  NMR spectrum ( $\text{CDCl}_3$ , 100 MHz, 25 °C) of complex **2j**.
- FS29.**  $^1\text{H}$  NMR spectrum ( $\text{CDCl}_3$ , 400 MHz, 25 °C) of complex **2k**.
- FS30.**  $^{13}\text{C}$  NMR spectrum ( $\text{CDCl}_3$ , 100 MHz, 25 °C) of complex **2k**.
- FS31.**  $^1\text{H}$  NMR spectrum ( $\text{CDCl}_3$ , 400 MHz, 25 °C) of complex **2l**.
- FS32.**  $^{13}\text{C}$  NMR spectrum ( $\text{CDCl}_3$ , 100 MHz, 25 °C) of complex **2l**.
- FS33.**  $^1\text{H}$  NMR spectrum ( $\text{CDCl}_3$ , 400 MHz, 25 °C) of complex **2m**.
- FS34.**  $^1\text{H}$  NMR spectrum ( $\text{CDCl}_3$ , 400 MHz, 25 °C) of complex **2n**.
- FS35.**  $^{13}\text{C}$  NMR spectrum ( $\text{CDCl}_3$ , 100 MHz, 25 °C) of complex **2n**.
- FS36.**  $^1\text{H}$  NMR spectrum ( $\text{CDCl}_3$ , 400 MHz, 25 °C) of complex **2o**.
- FS37.**  $^1\text{H}$  NMR spectrum ( $\text{C}_6\text{D}_6$ , 300 MHz, 25 °C) of the stoichiometric reaction between complex **3** and  $\text{Ph}_2\text{SiH}_2$ .
- FS38.**  $^1\text{H}$  NMR spectrum ( $\text{C}_6\text{D}_6$ , 300 MHz, 25 °C) of the stoichiometric reaction between 4-aminoacetophenone and  $\text{Ph}_2\text{SiH}_2$ .
- FS39.**  $^1\text{H}$  NMR spectrum ( $\text{C}_6\text{D}_6$ , 300 MHz, 25 °C) of the reaction of aniline and 4-methylbenzonitrile in presence of one equiv.  $\text{Ph}_2\text{SiH}_2$ .
- FS40.**  $^1\text{H}$  NMR spectrum ( $\text{C}_6\text{D}_6$ , 300 MHz, 25 °C) of the reaction of aniline and methyl p-toluate in presence of one equiv.  $\text{Ph}_2\text{SiH}_2$ .

**TS1. Crystallographic data and refinement parameters of 2b, 2c, 3 and 4.**

| <b>Crystal Parameters</b>                                   | <b>2c ( exp_6252)</b>                                              | <b>3 (exp_6384)</b>                                                  | <b>4 ( exp_6203)</b>                                                 |
|-------------------------------------------------------------|--------------------------------------------------------------------|----------------------------------------------------------------------|----------------------------------------------------------------------|
| CCDC No.                                                    | 2251323                                                            | 2251324                                                              | 2251325                                                              |
| Empirical formula                                           | C <sub>25</sub> H <sub>23</sub> NSi                                | C <sub>73</sub> H <sub>80</sub> N <sub>8</sub> Zn <sub>2</sub>       | C <sub>58</sub> H <sub>84</sub> N <sub>4</sub> Zn <sub>2</sub>       |
| Formula weight                                              | 365.53                                                             | 1200.19                                                              | 968.07                                                               |
| <i>T</i> (K)                                                | 293(2) K                                                           | 150(2) K                                                             | 150(2) K                                                             |
| $\lambda$ (Å)                                               | 1.54184 Å                                                          | 1.54184 Å                                                            | 0.71073 Å                                                            |
| Crystal system                                              | Monoclinic                                                         | Triclinic                                                            | Monoclinic                                                           |
| Space group                                                 | <i>P</i> 2 <sub>1</sub>                                            | <i>P</i> -1                                                          | <i>P</i> 2 <sub>1</sub> /n                                           |
| <i>a</i> (Å)                                                | 6.8198(2)                                                          | 11.3908(7)                                                           | 12.3983(4)                                                           |
| <i>b</i> (Å)                                                | 11.6463(4)                                                         | 12.4371(15)                                                          | 15.3924(4)                                                           |
| <i>c</i> (Å)                                                | 12.6683(5)                                                         | 12.7916(13)                                                          | 14.3196(3)                                                           |
| $\alpha$ (°)                                                | 90.00                                                              | 113.736(11)                                                          | 90.00                                                                |
| $\beta$ (°)                                                 | 99.955(3)                                                          | 104.197(7)                                                           | 103.902(3)                                                           |
| $\gamma$ (°)                                                | 90.00                                                              | 95.841(7)                                                            | 90.00                                                                |
| <i>V</i> (Å <sup>3</sup> )                                  | 991.04(6)                                                          | 1555.5(3)                                                            | 2652.7(12)                                                           |
| <i>Z</i>                                                    | 2                                                                  | 1                                                                    | 2                                                                    |
| <i>D</i> <sub>calc</sub> g cm <sup>-3</sup>                 | 1.225                                                              | 1.281                                                                | 1.212                                                                |
| $\mu$ (mm <sup>-1</sup> )                                   | 1.091                                                              | 1.323                                                                | 0.944                                                                |
| <i>F</i> (000)                                              | 388                                                                | 634                                                                  | 1040                                                                 |
| Theta range for data collection                             | 3.542 to 70.597 deg                                                | 3.977 to 69.998 deg                                                  | 3.176 to 71.671 deg                                                  |
| Limiting indices                                            | -8 ≤ <i>h</i> ≤ 5,<br>-13 ≤ <i>k</i> ≤ 13,<br>-14 ≤ <i>l</i> ≤ 15  | -13 ≤ <i>h</i> ≤ 10,<br>-13 ≤ <i>k</i> ≤ 15,<br>-15 ≤ <i>l</i> ≤ 15. | -15 ≤ <i>h</i> ≤ 10,<br>-18 ≤ <i>k</i> ≤ 17,<br>-17 ≤ <i>l</i> ≤ 17. |
| Reflections collected / unique                              | 4118 / 2908<br>[ <i>R</i> (int) = 0.0228]                          | 11390 / 5847 [ <i>R</i> (int) = 0.0393]                              | 10004 / 5057 [ <i>R</i> (int) = 0.0485]                              |
| Completeness to theta                                       | 99.8 %                                                             | 99.9 %                                                               | 97.8 %                                                               |
| Absorption correction                                       | Semi-empirical from equivalents                                    | Semi-empirical from equivalents                                      | Semi-empirical from equivalents                                      |
| Max. and min. transmission                                  | 1.00000 and 0.79954                                                | 1.00000 and 0.95993                                                  | 1.00000 and 0.83710                                                  |
| Refinement method                                           | Full-matrix least-squares on <i>F</i> <sup>2</sup>                 | Full-matrix least-squares on <i>F</i> <sup>2</sup>                   | Full-matrix least-squares on <i>F</i> <sup>2</sup>                   |
| Data / restraints / parameters                              | 2908 / 1 / 246                                                     | 5847 / 3 / 373                                                       | 5057 / 0 / 302                                                       |
| Goodness-of-fit on <i>F</i> <sup>2</sup>                    | 1.100                                                              | 0.926                                                                | 1.041                                                                |
| Final <i>R</i> indices                                      | <i>R</i> <sub>1</sub> = 0.0532,<br><i>wR</i> <sub>2</sub> = 0.1464 | <i>R</i> <sub>1</sub> = 0.0687, <i>wR</i> <sub>2</sub> = 0.1934      | <i>R</i> <sub>1</sub> = 0.0773, <i>wR</i> <sub>2</sub> = 0.2195      |
| [ <i>I</i> > 2σ( <i>I</i> )]<br><i>R</i> indices (all data) | <i>R</i> <sub>1</sub> = 0.0547,<br><i>wR</i> <sub>2</sub> = 0.1483 | <i>R</i> <sub>1</sub> = 0.0918, <i>wR</i> <sub>2</sub> = 0.2183      | <i>R</i> <sub>1</sub> = 0.0838, <i>wR</i> <sub>2</sub> = 0.2301      |

## NMR spectroscopy data of aminosilanes:

### 1,1'-(phenylsilanediyl)dipyrrolidine (1a)<sup>1</sup>

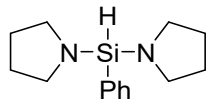

Yield: 95%. <sup>1</sup>H-NMR (CDCl<sub>3</sub>, 400 MHz, 25 °C): δ<sub>H</sub> 7.66-7.64 (m, 2H, Ar-*H*), 7.42 (t, *J* = 4 Hz, 3H, Ar-*H*), 5.01 (s, 1H, Si-*H*), 3.10-3.07 (m, 8H, N-*CH*<sub>2</sub>), 1.79-1.76 (m, 8H, *CH*<sub>2</sub>) ppm.

### 1-(diphenylsilyl)pyrrolidine (1b)<sup>1</sup>

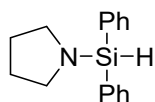

Yield: 96%. <sup>1</sup>H-NMR (CDCl<sub>3</sub>, 400 MHz, 25 °C): δ<sub>H</sub> 7.69-7.67 (m, 4H, Ar-*H*), 7.23-7.21 (m, 6H, Ar-*H*), 5.66 (s, 1H, Si-*H*), 3.03-3.00 (m, 4H, N-*CH*<sub>2</sub>), 1.54-1.51 (m, 4H, *CH*<sub>2</sub>) ppm.

### Diphenyldi(pyrrolidin-1-yl)silane (1c)<sup>2</sup>

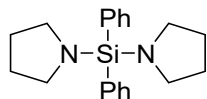

Yield: 95%. <sup>1</sup>H-NMR (CDCl<sub>3</sub>, 400 MHz, 25 °C): δ<sub>H</sub> 7.66-7.64 (m, 4H, Ar-*H*), 7.19-7.16 (m, 6H, Ar-*H*), 3.03-3.00 (m, 8H, N-*CH*<sub>2</sub>), 1.51-1.48 (m, 8H, *CH*<sub>2</sub>) ppm.

### 1-(triphenylsilyl)pyrrolidine (1d)<sup>2</sup>

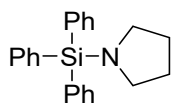

Yield: 95%. <sup>1</sup>H-NMR (CDCl<sub>3</sub>, 400 MHz, 25 °C): δ<sub>H</sub> 7.63-7.61 (m, 6H, Ar-*H*), 7.14-7.12 (m, 9H, Ar-*H*), 3.01-2.98 (m, 4H, N-*CH*<sub>2</sub>), 1.48-1.45 (m, 4H, *CH*<sub>2</sub>) ppm.

### *N,N*-diethyl-1-phenylsilanamine (1e)<sup>1</sup>

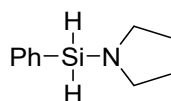

Yield: 96%. <sup>1</sup>H-NMR (CDCl<sub>3</sub>, 400 MHz, 25 °C): δ<sub>H</sub> 7.42-7.39 (m, 2H, Ar-*H*), 6.99-6.98 (m, 3H, Ar-*H*), 4.91 (s, 1H, Si-*H*), 2.63-2.57 (m, 4H, N-*CH*<sub>2</sub>), 0.73 (t, *J* = 8 Hz, 6H, *CH*<sub>3</sub>) ppm.

***N,N*-diethyl-1,1-diphenylsilanamine (1f)<sup>1</sup>**

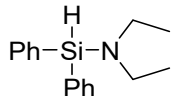

Yield: 94%. <sup>1</sup>H-NMR (CDCl<sub>3</sub>, 400 MHz, 25 °C): δ<sub>H</sub> 7.55-7.52 (m, 4H, Ar-*H*), 7.32-7.28 (m, 6H, Ar-*H*), 5.24 (s, 1H, Si-*H*), 2.89-2.85 (m, 4H, N-*CH*<sub>2</sub>), 0.95 (t, *J* = 4 Hz, 6H, *CH*<sub>2</sub>) ppm.

***N,N*-diethyl-1,1,1-triphenylsilanamine (1g)<sup>3</sup>**

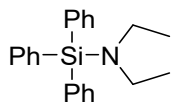

Yield: 92%. <sup>1</sup>H-NMR (CDCl<sub>3</sub>, 400 MHz, 25 °C): δ<sub>H</sub> 7.78-7.75 (m, 6H, Ar-*H*), 7.23-7.21 (m, 9H, Ar-*H*), 3.00 (q, *J* = 8 Hz, 4H, N-*CH*<sub>2</sub>), 0.95 (t, *J* = 6 Hz, 6H, *CH*<sub>2</sub>) ppm.

***N*-tert-butyl-1,1-diphenylsilanamine (1h)<sup>1</sup>**

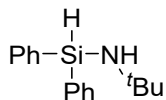

Yield: 95%. <sup>1</sup>H-NMR (CDCl<sub>3</sub>, 400 MHz, 25 °C): δ<sub>H</sub> 7.60-7.57 (m, 4H, Ar-*H*), 7.11-7.09 (m, 6H, Ar-*H*), 5.60 (s, 1H, Si-*H*), 1.02 (s, 9H, N-*CH*<sub>3</sub>), 0.84 (s, 1H, N-*H*) ppm.

***N*-tert-butyl-1,1,1-triphenylsilanamine (1i)<sup>2</sup>**

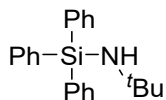

Yield: 93%. <sup>1</sup>H-NMR (CDCl<sub>3</sub>, 400 MHz, 25 °C): δ<sub>H</sub> 7.85-7.83 (m, 6H, Ar-*H*), 7.22-7.20 (m, 9H, Ar-*H*), 1.29 (s, 1H, N-*H*), 1.10 (s, 9H, N-*CH*<sub>3</sub>) ppm.

***N,N'*-1-triphenylsilanediamine (2a)<sup>4</sup>**

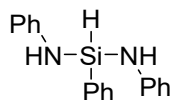

Yield: 94%. <sup>1</sup>H-NMR (CDCl<sub>3</sub>, 400 MHz, 25 °C): δ<sub>H</sub> 7.98 (d, *J* = 8 Hz, 2H, Ar-*H*), 7.70-7.63 (m, 3H, Ar-*H*), 7.38 (t, *J* = 8 Hz, 4H, Ar-*H*), 7.04 (d, *J* = 8 Hz, 6H, Ar-*H*), 5.82 (s, 1H, Si-*H*), 4.11 (s, 2H, N-*H*) ppm.

#### ***N*,1,1-triphenylsilanamine (2b)<sup>4</sup>**

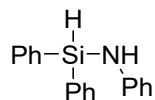

Yield: 97%. <sup>1</sup>H-NMR (CDCl<sub>3</sub>, 400 MHz, 25 °C): δ<sub>H</sub> 7.57 (d, *J* = 8 Hz, 4H, Ar-*H*), 7.35-7.28 (m, 6H, Ar-*H*), 7.01 (t, *J* = 8 Hz, 2H, Ar-*H*), 6.62 (d, *J* = 8 Hz, 3H, Ar-*H*), 5.52 (s, 1H, Si-*H*), 3.75 (s, 1H, N-*H*) ppm.

#### ***N*-benzyl-1,1,1-triphenylsilanamine (2c)<sup>2</sup>**

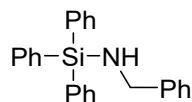

Yield: 90%. <sup>1</sup>H-NMR (CDCl<sub>3</sub>, 400 MHz, 25 °C): δ<sub>H</sub> 7.61-7.59 (m, 5H, Ar-*H*), 7.11-7.08 (m, 15H, Ar-*H*), 3.91 (d, *J* = 8 Hz, 2H, N-CH<sub>2</sub>) ppm.

#### ***N,N'*-bis(2,6-diisopropylphenyl)-1-phenylsilanedi-amine (2d)<sup>5</sup>**

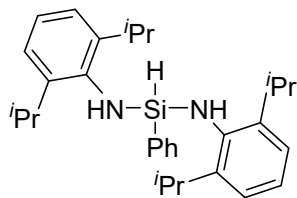

Yield: 85%. <sup>1</sup>H-NMR (CDCl<sub>3</sub>, 400 MHz, 25 °C): δ<sub>H</sub> 8.03-8.01 (m, 2H, Ar-*H*), 7.67 (d, *J* = 4 Hz, 3H, Ar-*H*), 7.34-7.28 (m, 6H, Ar-*H*), 5.68 (s, 1H, Si-*H*), 3.52-3.48 (m, 4H, CH(CH<sub>3</sub>)<sub>2</sub>) 3.31 (d, *J* = 4 Hz, 2H, N-*H*), 1.39-1.32 (m, 24H, CH(CH<sub>3</sub>)<sub>2</sub>) ppm.

#### ***N*-(2,6-diisopropylphenyl)-1,1-diphenylsilanamine (2e)<sup>1</sup>**

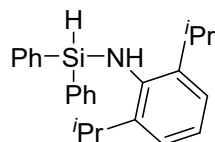

Yield: 90%. <sup>1</sup>H-NMR (CDCl<sub>3</sub>, 400 MHz, 25 °C): δ<sub>H</sub> 7.85-7.83 (m, 4H, Ar-*H*), 7.60-7.56 (m, 6H, Ar-*H*), 7.32-7.27 (m, 3H, Ar-*H*), 5.82 (s, 1H, Si-*H*), 3.68-3.59 (m, 2H, CH(CH<sub>3</sub>)<sub>2</sub>) 3.37 (s, 1H, N-*H*), 1.35 (d, *J* = 4 Hz, 12H, CH(CH<sub>3</sub>)<sub>2</sub>) ppm.

### 1,1-diphenyl-*N*-(*o*-tolyl)silanamine (2f)

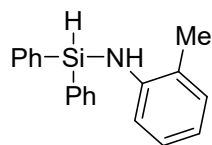

Yield: 94%.  $^1\text{H}$  NMR ( $\text{CDCl}_3$ , 400 MHz, 25 °C)  $\delta$  7.58-7.50 (m, 4H, Ar-*H*), 7.30-7.24 (m, 6H, Ar-*H*), 7.20-7.16 (m, 1H, Ar-*H*), 6.95-6.93 (m, 1H, Ar-*H*), 6.83-6.79 (m, 1H, Ar-*H*), 6.64-6.60 (m, 1H, Ar-*H*), 4.86 (s, 1H, Si-*H*), 4.03 (s, 1H, N-*H*), 2.18 (s, 3H,  $\text{CH}_3$ ) ppm.  $^{13}\text{C}\{^1\text{H}\}$  NMR ( $\text{CDCl}_3$ , 100 MHz, 25 °C)  $\delta$  143.9 (ArC-N), 135.6 (Ar-C), 134.7 (Ar-C), 134.6 (Ar-C), 129.9 (Ar-C), 128.3 (Ar-C), 127.7 (Ar-C), 119.0 (Ar-C), 116.7 (Ar-C), 19.1 ( $\text{CH}_3$ ) ppm. Elemental analysis: ( $\text{C}_{19}\text{H}_{19}\text{NSi}$ ) (289.0); calcd. C 78.84, H 6.62, N 4.84; found C 78.67, H 6.52, N 4.72.

### *N*-(2-methoxyphenyl)-1-phenylsilanamine (2g)

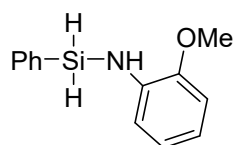

Yield: 95%.  $^1\text{H}$  NMR ( $\text{CDCl}_3$ , 400 MHz, 25 °C)  $\delta$  7.67-7.61 (m, 1H, Ar-*H*), 7.48-7.42 (m, 1H, Ar-*H*), 7.31-7.26 (m, 3H, Ar-*H*), 7.13-7.07 (m, 2H, Ar-*H*), 6.86-6.81 (m, 1H, Ar-*H*), 6.67 (d,  $J = 8$  Hz, 1H, Ar-*H*), 4.90 (s, 1H, Si-*H*), 4.87 (br, 1H, N-*H*), 3.61 (s, 3H,  $\text{CH}_3$ ) ppm.  $^{13}\text{C}\{^1\text{H}\}$  NMR ( $\text{CDCl}_3$ , 100 MHz, 25 °C)  $\delta$  156.4 (ArC-N), 135.1 (Ar-C), 134.3 (Ar-C), 130.7 (Ar-C), 128.8 (Ar-C), 128.4 (Ar-C), 127.9 (Ar-C), 127.5 (Ar-C), 120.4 (Ar-C), 119.9 (Ar-C), 109.7 (Ar-C), 55.1 ( $\text{OCH}_3$ ) ppm. Elemental analysis: ( $\text{C}_{13}\text{H}_{15}\text{NOSi}$ ) (229.3); calcd. C 68.08, H 6.59, N 6.11; found C 67.88, H 6.44, N 5.97.

### *N*-(2-fluorophenyl)-1,1-diphenylsilanamine (2h)

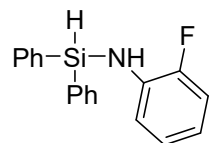

Yield: 95%.  $^1\text{H}$  NMR ( $\text{CDCl}_3$ , 400 MHz, 25 °C)  $\delta$  7.67-7.65 (m, 4H, Ar-*H*), 7.47-7.38 (m, 6H, Ar-*H*), 7.01-6.95 (m, 1H, Ar-*H*), 6.85 - 6.75 (m, 2H, Ar-*H*), 6.68-6.63 (m, 1H, Ar-*H*), 5.62 (s, 1H, Si-*H*), 4.13 (br, 1H, N-*H*) ppm.  $^{13}\text{C}\{^1\text{H}\}$  NMR ( $\text{CDCl}_3$ , 100 MHz, 25 °C)  $\delta$  153.8 (F attached Ar-C), 134.9 (Ar-C), 132.7 (Ar-C), 130.5 (Ar-C), 128.3 (Ar-C), 124.4 (Ar-C), 118.4 (Ar-C), 116.9 (Ar-C), 114.8 (Ar-C) ppm. Elemental analysis: ( $\text{C}_{18}\text{H}_{16}\text{FNSi}$ ) (293.4); calcd. C 73.68, H 5.50, N 4.77; found C 73.57, H 5.46, N 4.65.

### ***N,N'*-bis(2-bromophenyl)-1,1-diphenylsilanedi-amine (2i)**

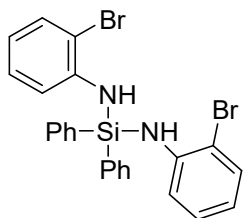

Yield: 94%.  $^1\text{H}$  NMR ( $\text{CDCl}_3$ , 400 MHz, 25 °C)  $\delta$  7.67-7.65 (m, 2H, Ar-*H*), 7.55-7.50 (m, 3H, Ar-*H*), 7.34-7.27 (m, 8H, Ar-*H*), 7.15-7.11 (m, 2H, Ar-*H*), 6.97-6.86 (m, 1H, Ar-*H*), 6.55-6.51 (m, 1H, Ar-*H*), 4.96 (br, 1H, *NH*), 4.84 (br, 1H, *NH*) ppm.  $^{13}\text{C}\{^1\text{H}\}$  NMR ( $\text{CDCl}_3$ , 100 MHz, 25 °C)  $\delta$  143.1 (Ar-C), 134.9 (Ar-C), 132.7 (Ar-C), 130.4 (Ar-C), 128.3 (Ar-C), 120.2 (Ar-C), 119.4 (Ar-C), 117.4 (Ar-C), 113.4 (Ar-C) ppm. Elemental analysis: ( $\text{C}_{24}\text{H}_{20}\text{Br}_2\text{N}_2\text{Si}$ ) (524.3); calcd. C 54.98, H 3.84, N 5.34; found C 54.82, H 3.69, N 5.24.

### ***N*-(2-iodophenyl)-1,1-diphenylsilanamine (2j)**

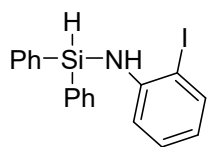

Yield: 90%.  $^1\text{H}$  NMR ( $\text{CDCl}_3$ , 400 MHz, 25 °C)  $\delta$  7.69-7.65 (m, 5H, Ar-*H*), 7.47-7.38 (m, 6H, Ar-*H*), 7.05-7.01 (m, 1H, Ar-*H*), 6.79 (dd,  $J = 6.6$  Hz, 1H, Ar-*H*), 6.46 (td,  $J = 7.4$  Hz, 1H, Ar-*H*), 5.60 (s, 1H, Si-*H*), 4.47 (br, 1H, *NH*) ppm.  $^{13}\text{C}\{^1\text{H}\}$  NMR ( $\text{CDCl}_3$ , 100 MHz, 25 °C)  $\delta$  153.8 (Ar-C), 134.9 (Ar-C), 132.7 (Ar-C), 130.5 (Ar-C), 128.3 (Ar-C), 124.4 (Ar-C), 118.4 (Ar-C), 116.9 (Ar-C), 115.0 (Ar-C), 114.8 (Ar-C) ppm. Elemental analysis: ( $\text{C}_{18}\text{H}_{16}\text{INSi}$ ) (401.3); calcd. C 53.87, H 4.02, N 3.49; found C 53.65, H 3.86, N 3.41.

### ***N,N*-dicyclohexyl-1,1-diphenylsilanamine (2k)**

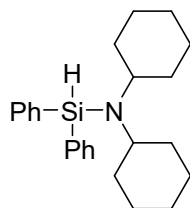

Yield: 90%.  $^1\text{H}$  NMR ( $\text{CDCl}_3$ , 400 MHz, 25 °C)  $\delta$  7.67 - 7.59 (m, 4H, Ar-*H*), 7.42-7.36 (m, 6H, Ar-*H*), 4.97 (s, 1H, Si-*H*), 2.60-2.58 (m, 2H, Cy-*H*), 1.91-1.73 (m, 9H, Cy-*H*), 1.30-1.24 (m, 1H, Cy-*H*), 1.08-1.04 (m, 10H, Ar-*H*), ppm.  $^{13}\text{C}\{^1\text{H}\}$  NMR ( $\text{CDCl}_3$ , 100 MHz, 25 °C)  $\delta$  135.7 (Ar-C), 134.3 (Ar-C), 130.3 (Ar-



C), 129.9 (Ar-C), 128.1 (Ar-C), 127.9 (Ar-C), 53.0 (Cy-C), 34.4 (Cy-C), 26.2 (Cy-C), 25.3 (Cy-C) ppm. Elemental analysis: (C<sub>24</sub>H<sub>33</sub>NSi) (363.6); calcd. C 79.28, H 9.15, N 3.85; found C 79.11, H 9.05, N 3.73.

### ***N*-(diphenylsilyl)pyrazin-2-amine (2l)**

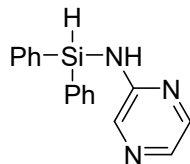

Yield: 95%. <sup>1</sup>H NMR (CDCl<sub>3</sub>, 400 MHz, 25 °C) δ 7.83-7.78 (m, 1H, Ar-H), 7.74 (s, 1H, NH), 7.50-7.48 (m, 6H, Ar-H), 7.30-7.25 (m, 6H, Ar-H), 4.83 (s, 1H, Si-H) ppm. <sup>13</sup>C{<sup>1</sup>H} NMR (CDCl<sub>3</sub>, 100 MHz, 25 °C) δ 155.4 (Ar-C), 141.9 (Ar-C), 135.6 (Ar-C), 134.4 (Ar-C), 134.3 (Ar-C), 129.8 (Ar-C), 128.0 (Ar-C), 127.8 (Ar-C) ppm. Elemental analysis: (C<sub>16</sub>H<sub>15</sub>N<sub>3</sub>Si) (277.4); calcd. C 69.28, H 5.45, N 15.15; found C 69.20, H 5.33, N 14.89.

### **1-(diphenylsilyl)-1H-indole (2m)**

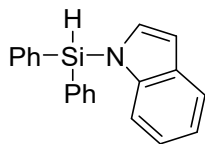

Yield: 90%. <sup>1</sup>H NMR (CDCl<sub>3</sub>, 400 MHz, 25 °C) δ 7.58-7.56 (m, 1H, Ar-H), 7.40-7.34 (m, 2H, Ar-H), 7.14-7.05 (m, 9H, Ar-H), 6.95-6.88 (m, 2H, Ar-H), 6.63 (d, *J* = 3 Hz, 1H, C=CH), 6.10 (d, *J* = 3 Hz, 1H, C=CH), 4.92 (s, 1H, Si-H), ppm. Elemental analysis: (C<sub>20</sub>H<sub>17</sub>NSi) (299.4); calcd. C 80.22, H 5.72, N 4.68; found C 80.15, H 5.66, N 4.57.

### **1-(diphenylsilyl)-1H-pyrrolo[2,3-*b*]pyridine (2n)**

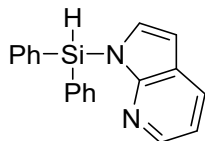

Yield: 90%. <sup>1</sup>H NMR (CDCl<sub>3</sub>, 400 MHz, 25 °C) δ 8.35 (d, *J* = 7.9 Hz, 1H, C=CH), 7.98 (d, *J* = 7.3 Hz, 1H, Ar-H), 7.63-7.61 (m, 4H, Ar-H), 7.40-7.39 (m, 7H, Ar-H), 7.12 (d, *J* = 3 Hz, 1H, C=CH), 6.53 (d, *J* = 3 Hz, 1H, C=CH), 4.94 (s, 1H, Si-H), ppm. <sup>13</sup>C{<sup>1</sup>H} NMR (CDCl<sub>3</sub>, 100 MHz, 25 °C) δ 142.6 (Ar-C), 135.6 (Ar-C), 134.3 (Ar-C), 129.8 (Ar-C), 128.1 (Ar-C), 127.9 (Ar-C), 115.8 (Ar-C), 100.6 (Ar-C) ppm. Elemental analysis: (C<sub>19</sub>H<sub>16</sub>N<sub>2</sub>Si) (300.4); calcd. C 75.96, H 5.37, N 9.32; found C 75.81, H 5.29, N 9.25.

## 9-(diphenylsilyl)-9H-carbazole (2o)

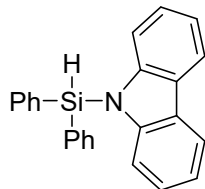

Yield: 88%.  $^1\text{H}$  NMR ( $\text{CDCl}_3$ , 400 MHz, 25 °C)  $\delta$  8.02-8.00 (m, 2H, Ar-H), 7.52-7.48 (m, 4H, Ar-H), 7.39-7.34 (m, 2H, Ar-H), 7.30-7.25 (m, 4H, Ar-H), 7.15-7.11 (m, 2H, Ar-H), 7.09-7.07 (m, 4H, Ar-H), 4.85 (s, 1H, Si-H) ppm. Elemental analysis: ( $\text{C}_{24}\text{H}_{19}\text{NSi}$ ) (349.5); calcd. C 82.48, H 5.48, N 4.01; found C 82.39, H 5.38, N 3.92.

### NMR spectra:

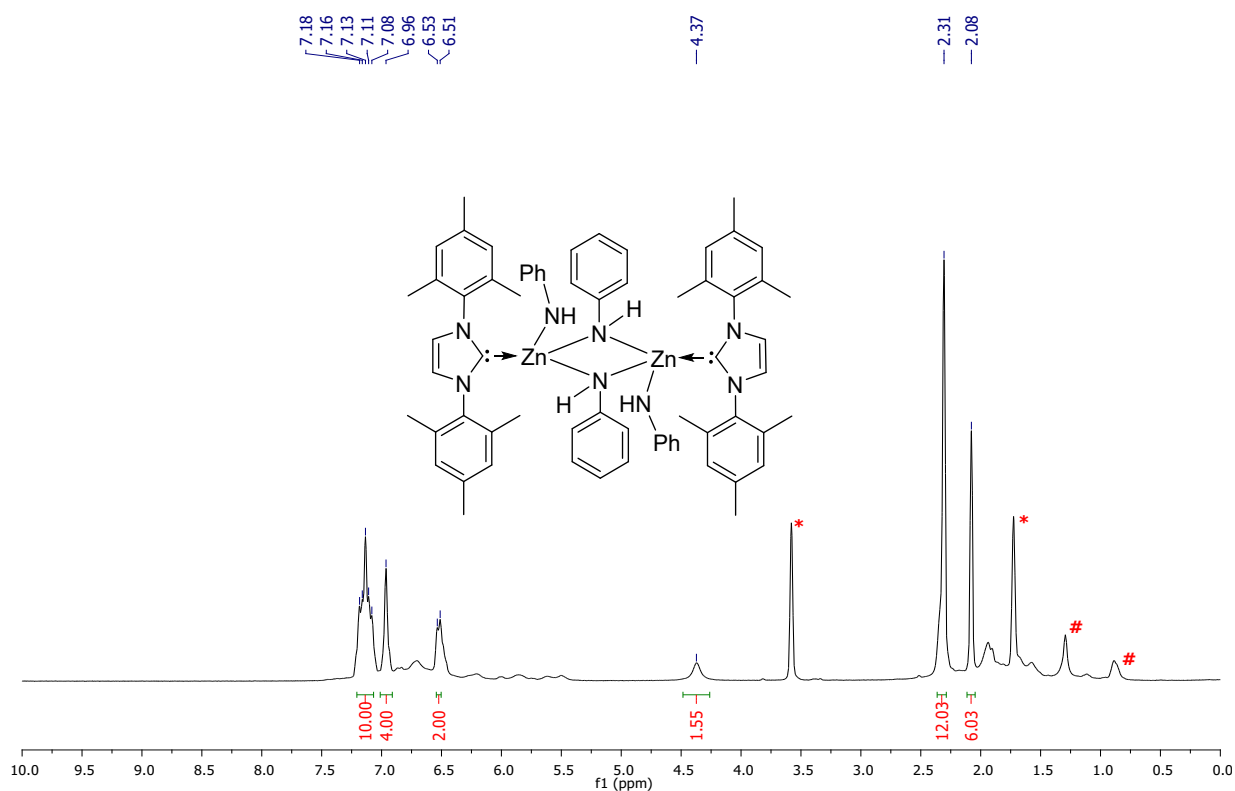

FS1:  $^1\text{H}$  NMR spectrum ( $\text{THF-}d_8$ , 300 MHz, 25 °C) of compound 3 (# n-Hexane, \* NMR solvent residual signals)

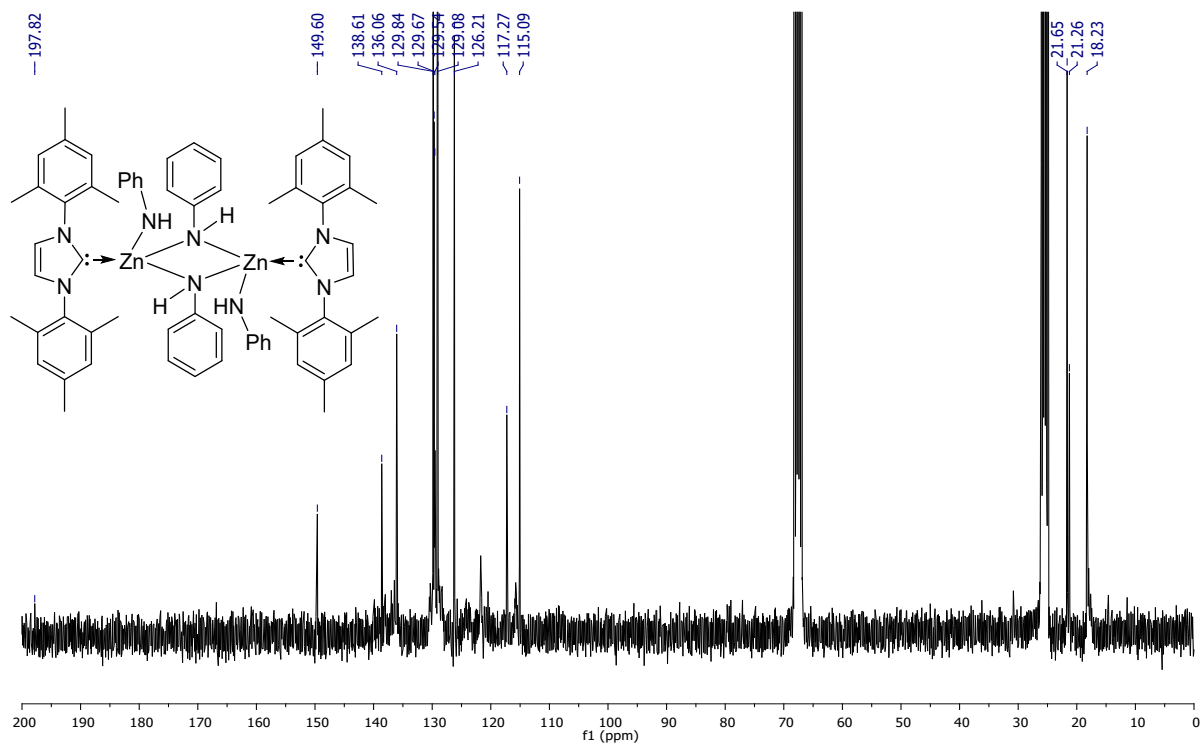

FS2:  $^{13}\text{C}\{^1\text{H}\}$  NMR spectrum (THF- $d_8$ , 75 MHz, 25 °C) of compound 3

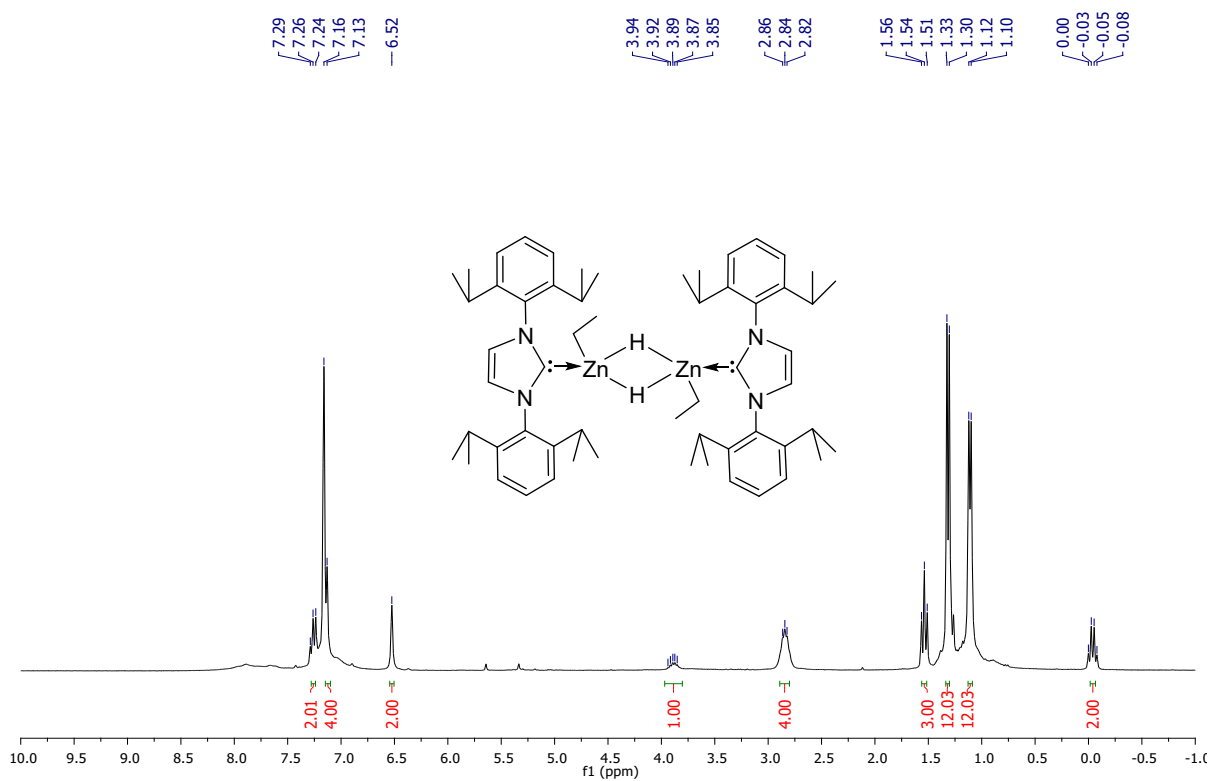

FS3:  $^1\text{H}$  NMR spectrum ( $\text{C}_6\text{D}_6$ , 300 MHz, 25 °C) of compound 4

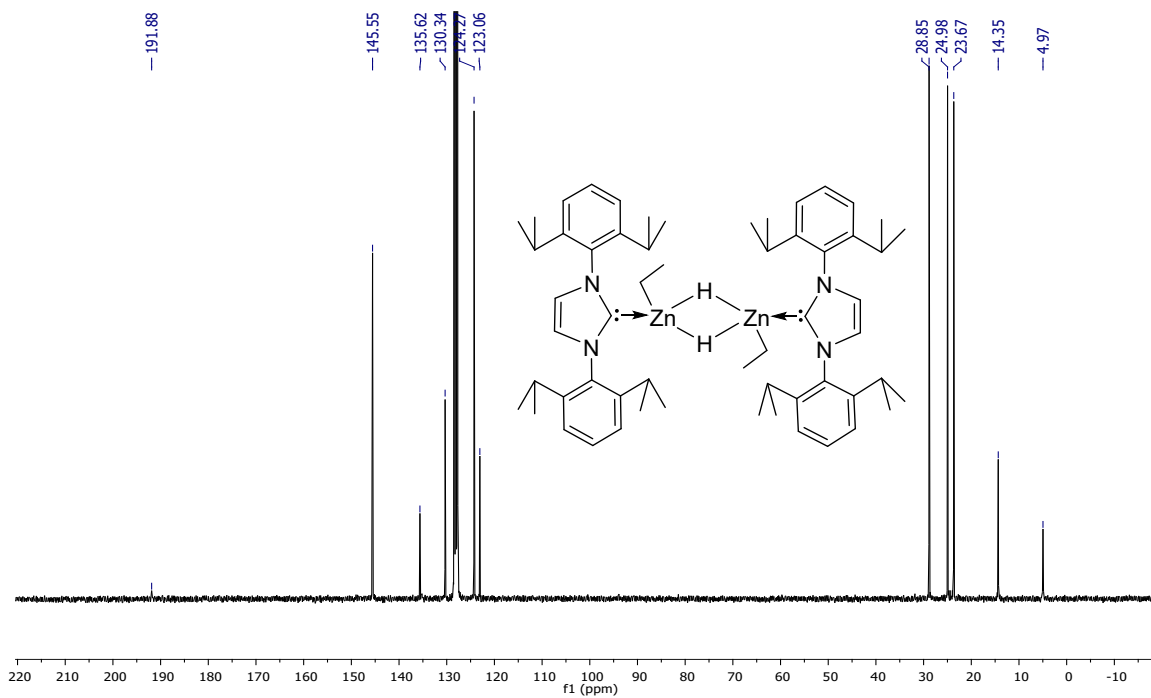

FS4:  $^{13}\text{C}\{^1\text{H}\}$  NMR spectrum ( $\text{C}_6\text{D}_6$ , 75 MHz, 25 °C) of compound 4

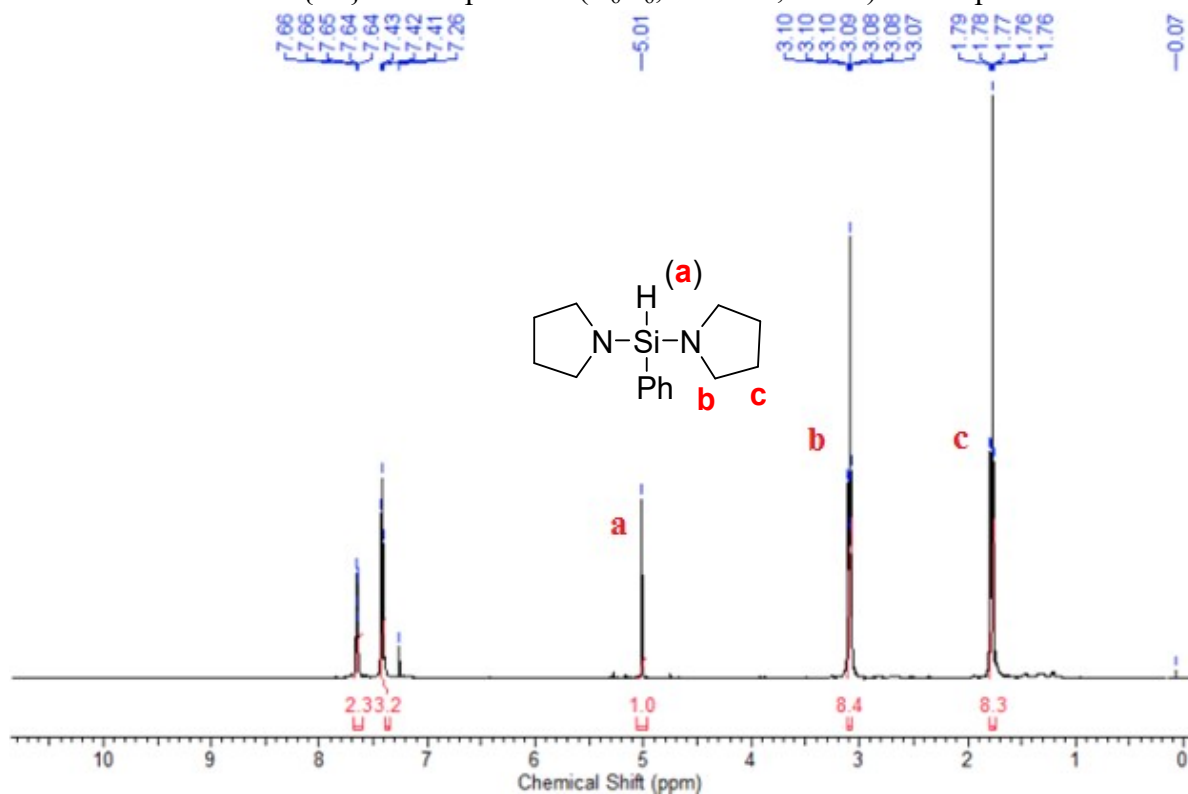

FS5:  $^1\text{H}$  NMR spectrum ( $\text{CDCl}_3$ , 400 MHz, 25 °C) of complex 1a.

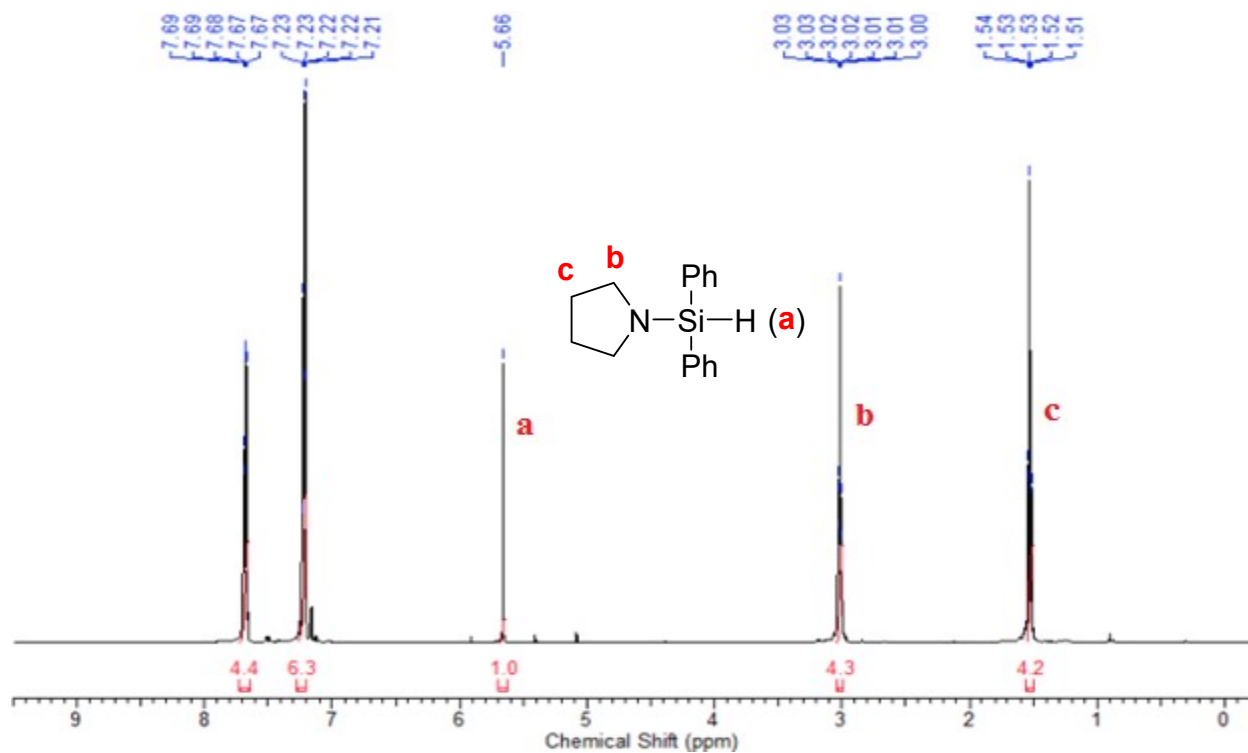

FS6. <sup>1</sup>H NMR spectrum (CDCl<sub>3</sub>, 400 MHz, 25 °C) of complex **1b**.

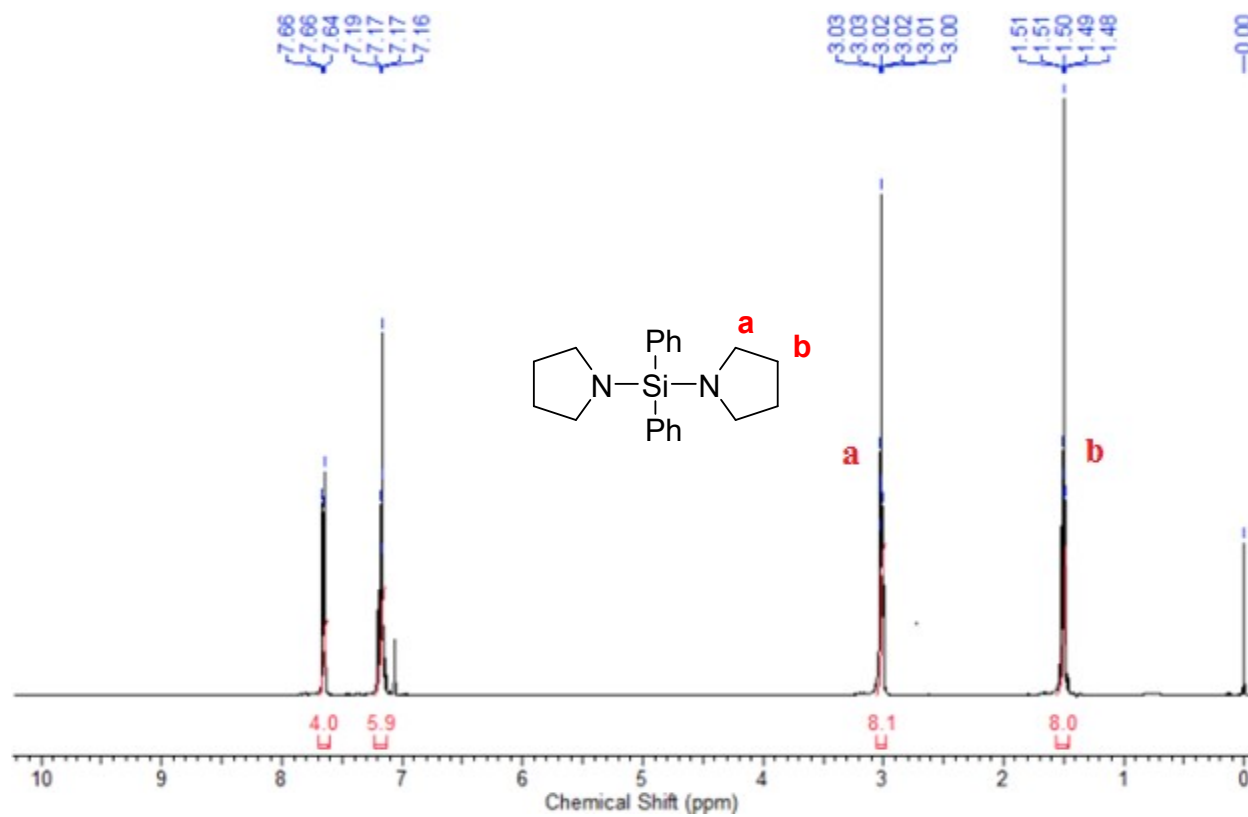

FS7. <sup>1</sup>H NMR spectrum (CDCl<sub>3</sub>, 400 MHz, 25 °C) of complex **1c**.

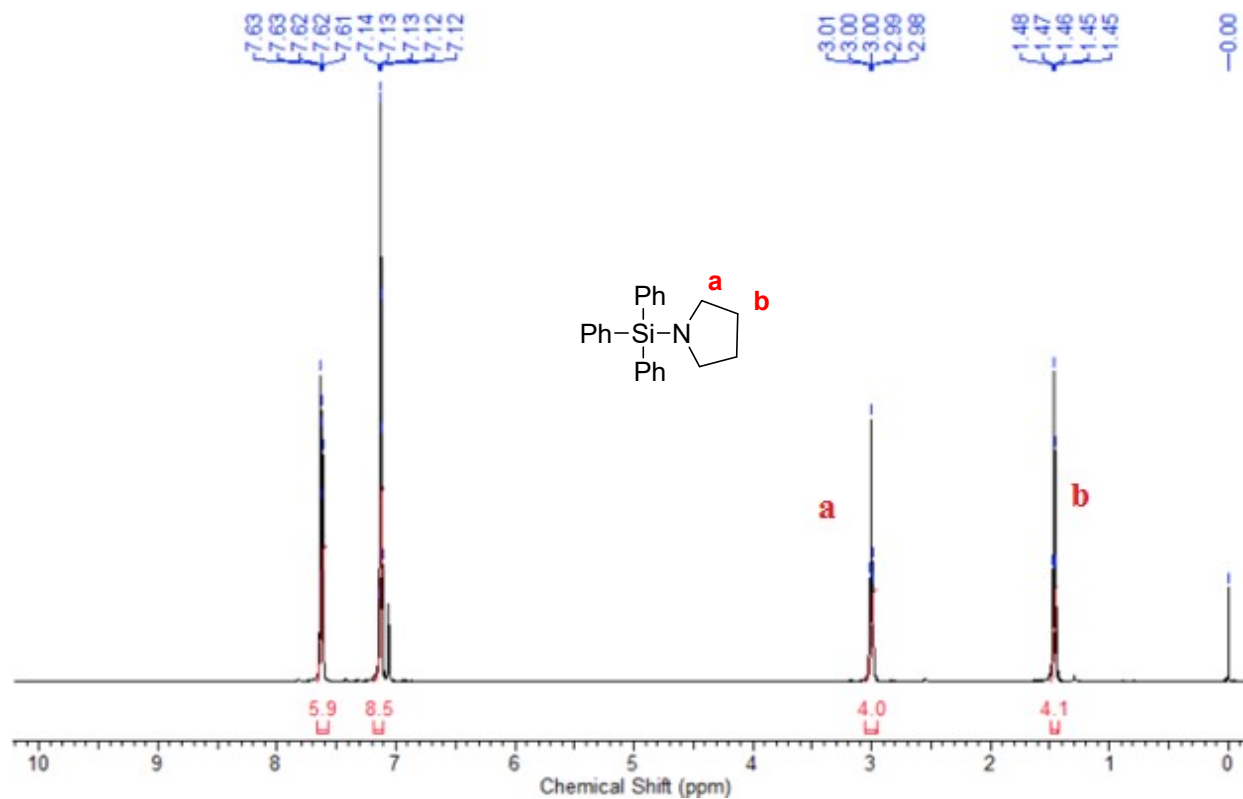

FS8. <sup>1</sup>H NMR spectrum (CDCl<sub>3</sub>, 400 MHz, 25 °C) of complex **1d**.

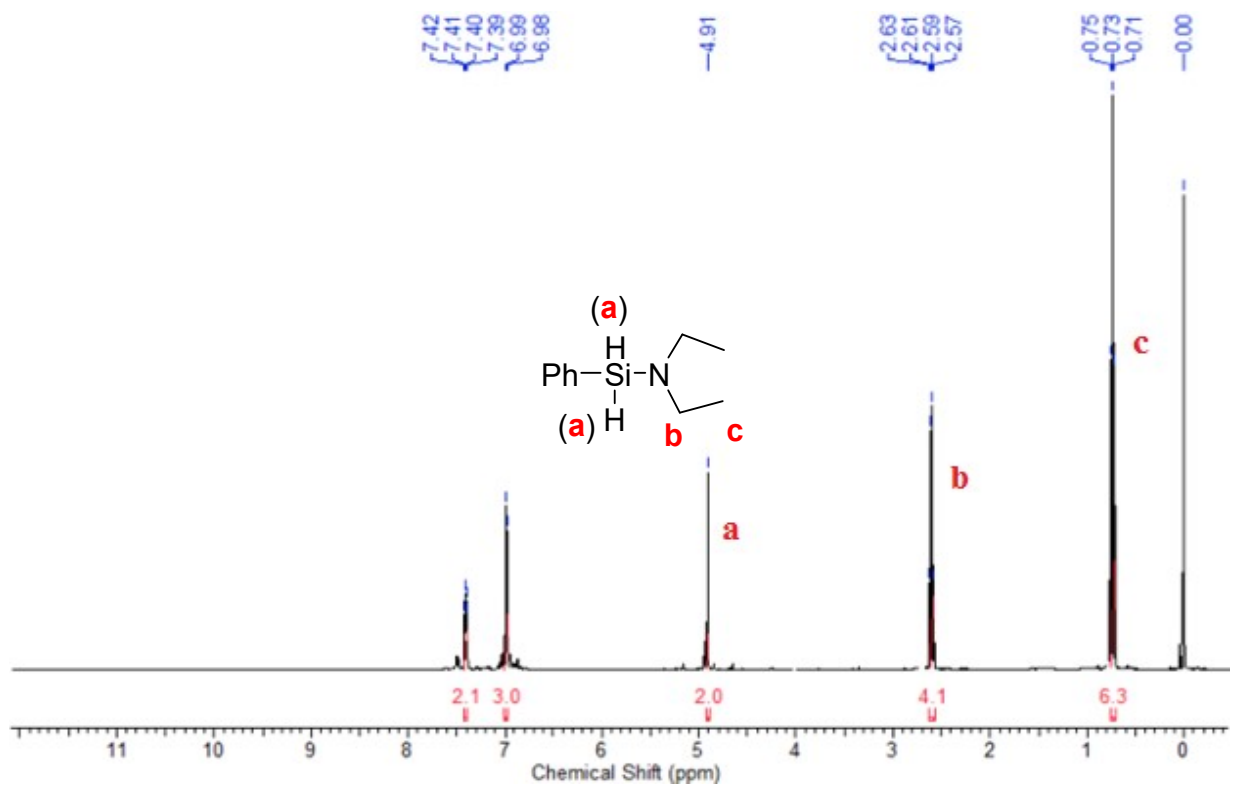

FS9. <sup>1</sup>H NMR spectrum (CDCl<sub>3</sub>, 400 MHz, 25 °C) of complex **1e**.

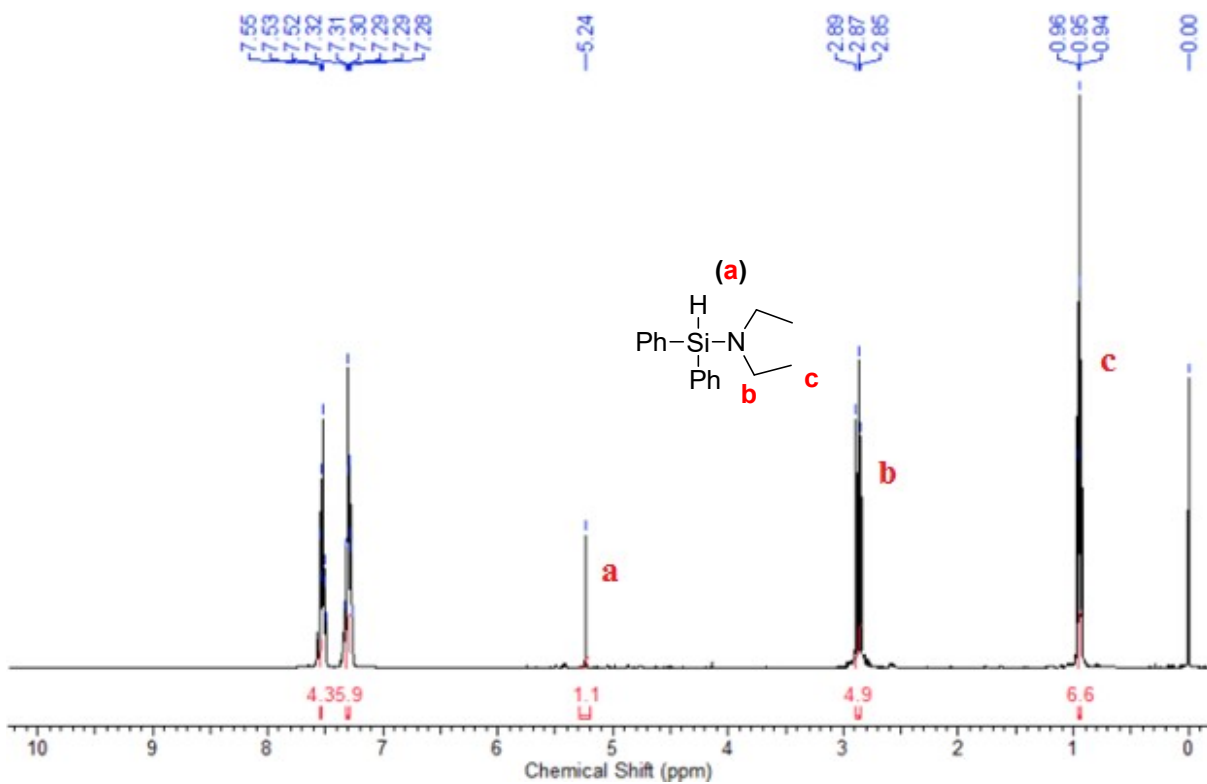

FS10. <sup>1</sup>H NMR spectrum (CDCl<sub>3</sub>, 400 MHz, 25 °C) of complex **1f**.

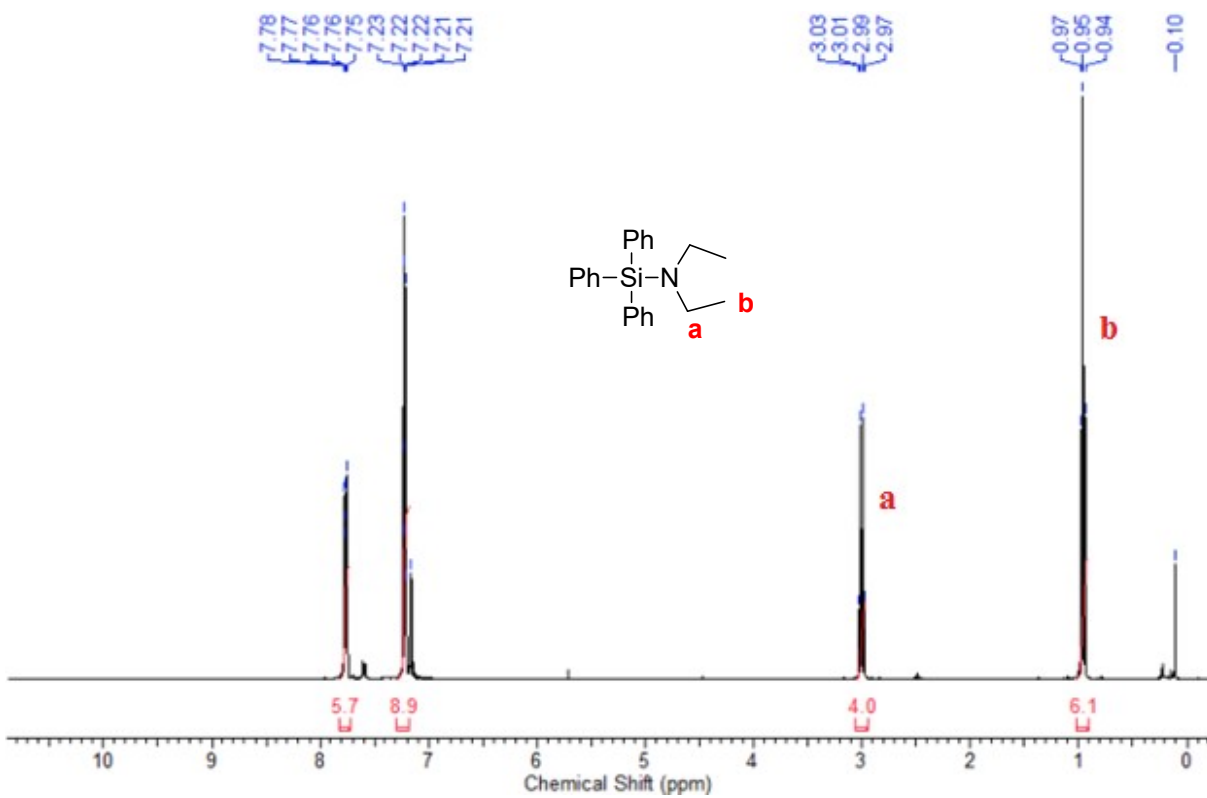

FS11. <sup>1</sup>H NMR spectrum (CDCl<sub>3</sub>, 400 MHz, 25 °C) of complex **1g**.

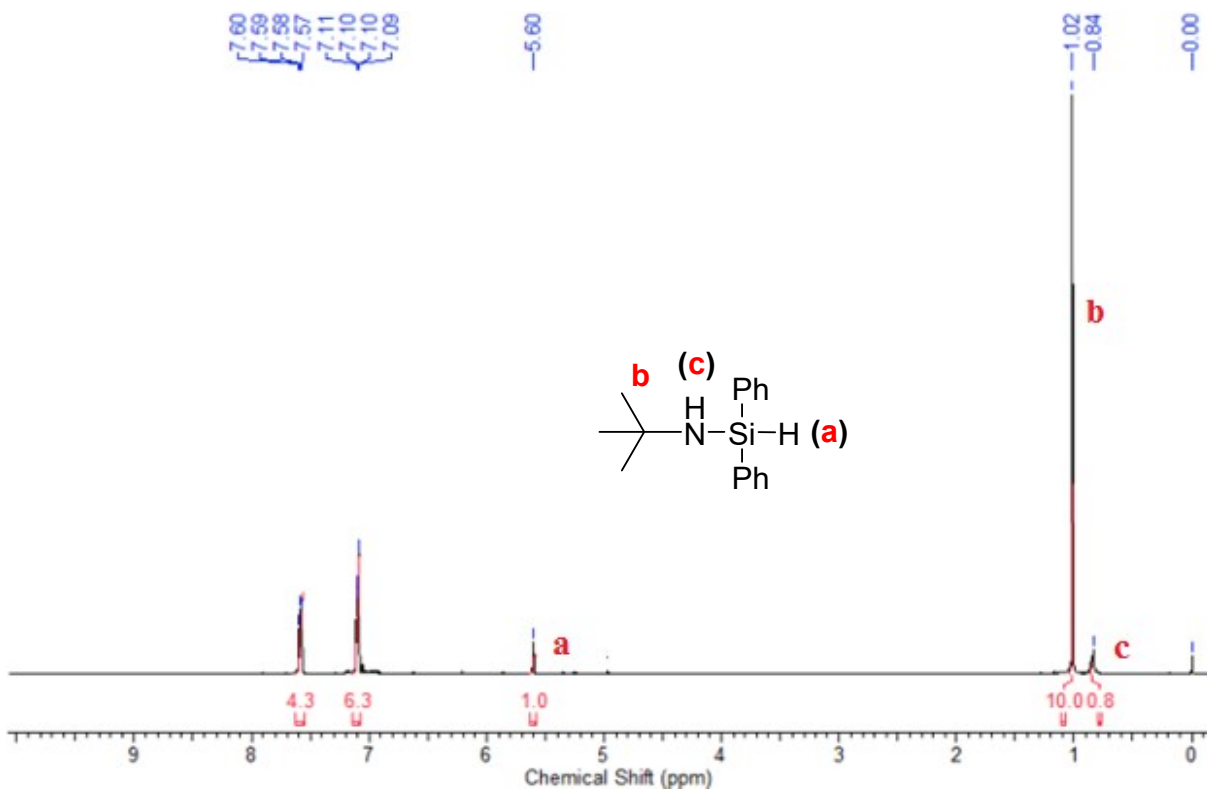

FS12. <sup>1</sup>H NMR spectrum (CDCl<sub>3</sub>, 400 MHz, 25 °C) of complex **1h**.

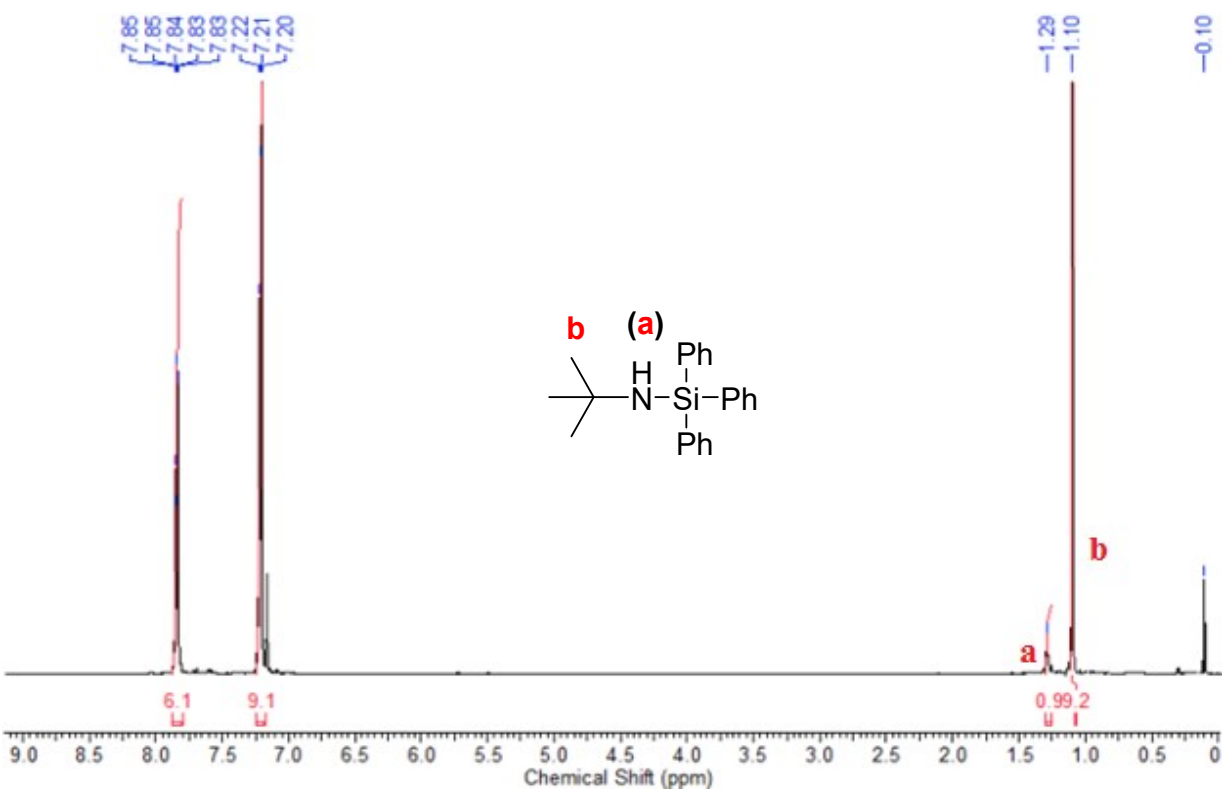

FS13. <sup>1</sup>H NMR spectrum (CDCl<sub>3</sub>, 400 MHz, 25 °C) of complex **1i**.



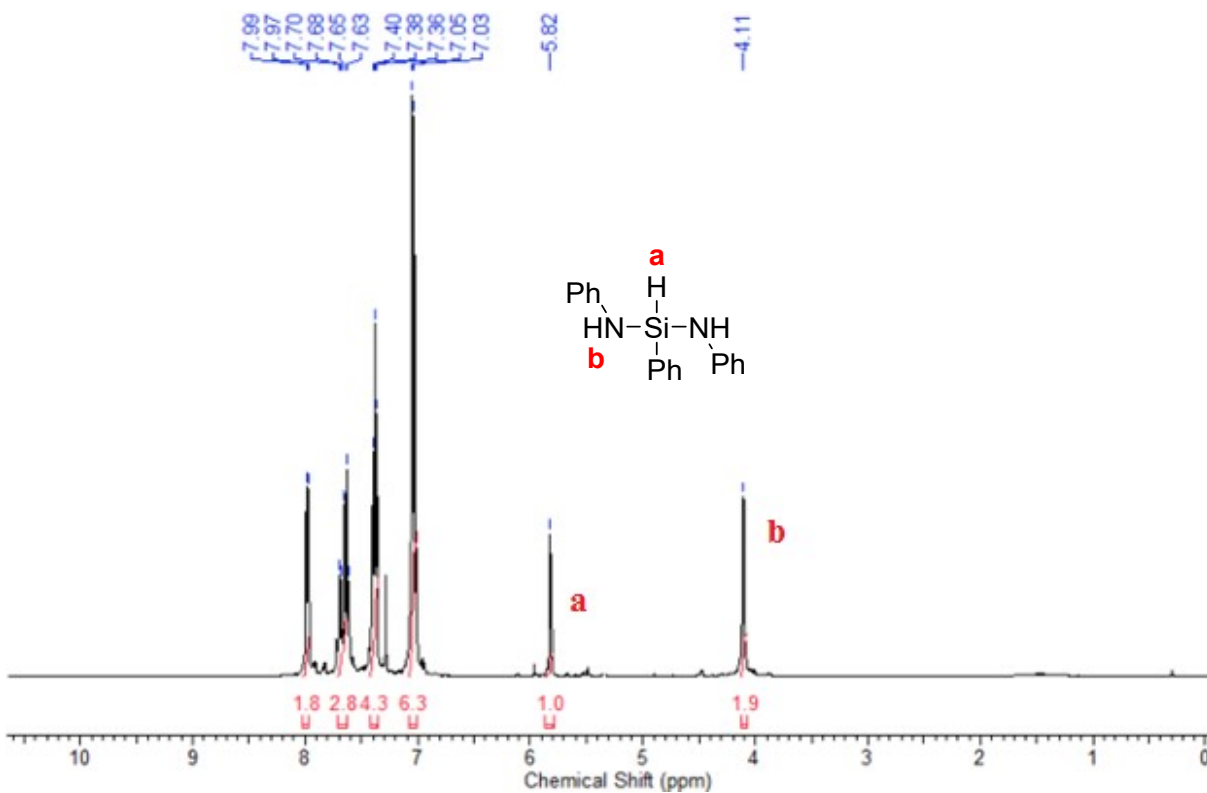

FS14.  $^1\text{H}$  NMR spectrum ( $\text{CDCl}_3$ , 400 MHz, 25  $^\circ\text{C}$ ) of complex **2a**.

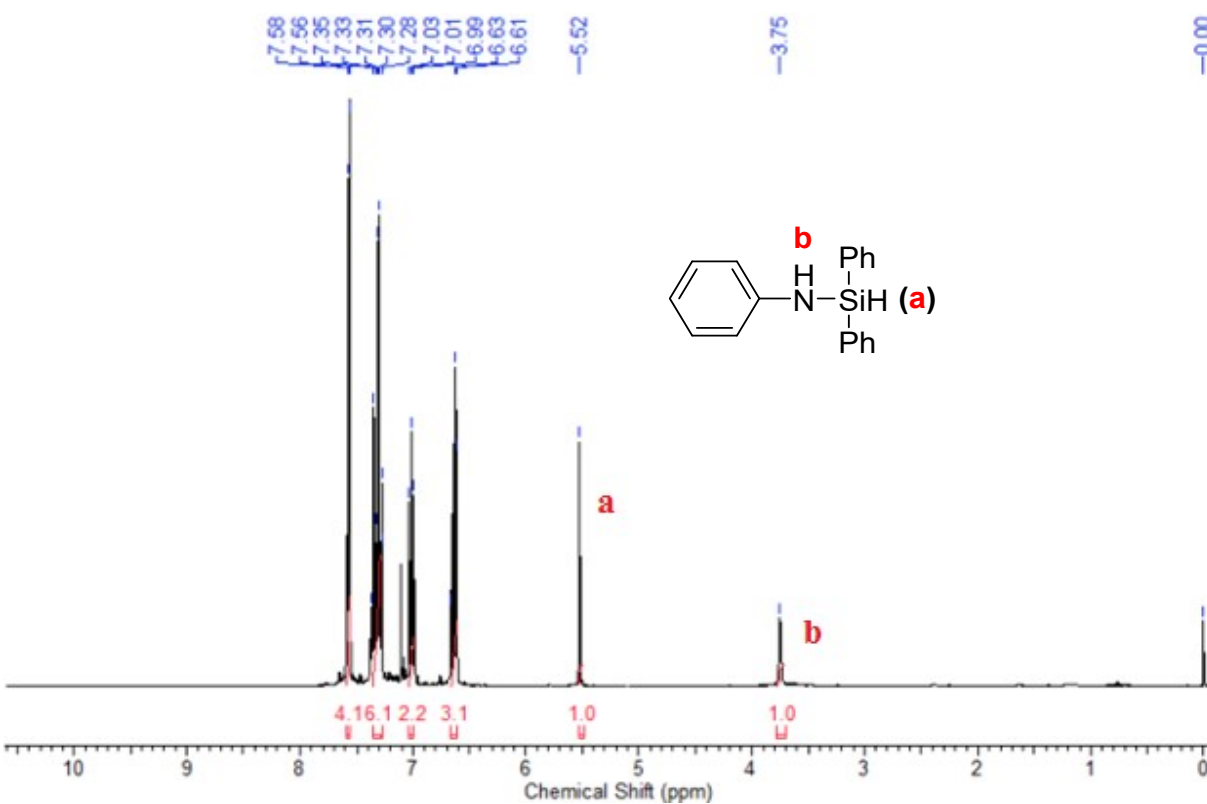

FS15.  $^1\text{H}$  NMR spectrum ( $\text{CDCl}_3$ , 400 MHz, 25  $^\circ\text{C}$ ) of complex **2b**.

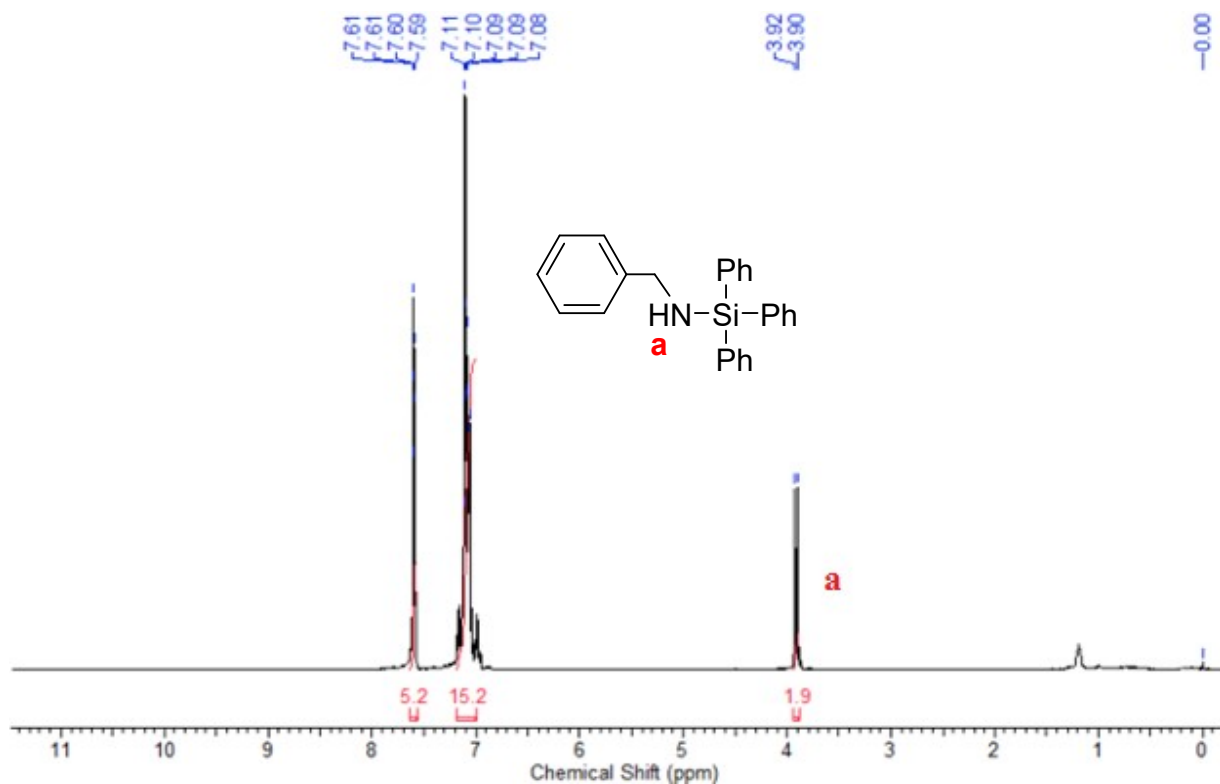

**FS16.** <sup>1</sup>H NMR spectrum (CDCl<sub>3</sub>, 400 MHz, 25 °C) of complex **2c**.

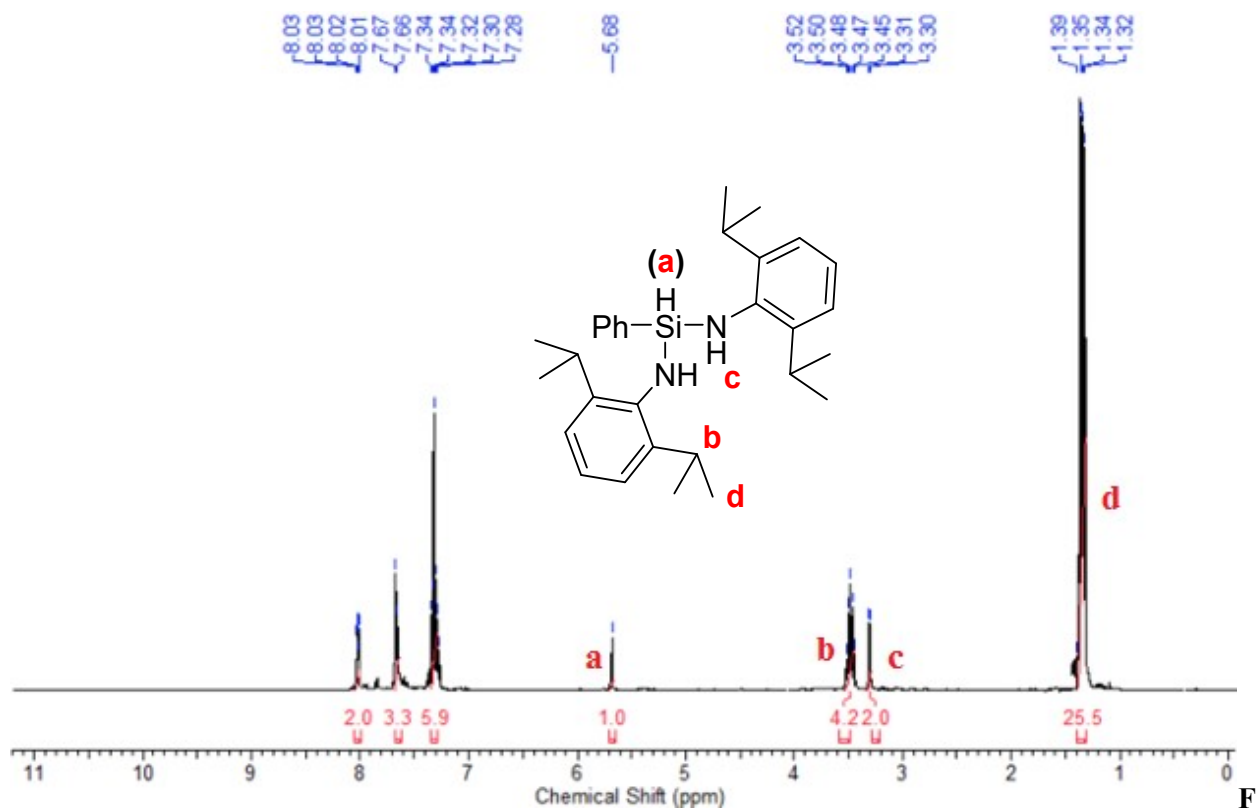

**S17.** <sup>1</sup>H NMR spectrum (CDCl<sub>3</sub>, 400 MHz, 25 °C) of complex **2d**.



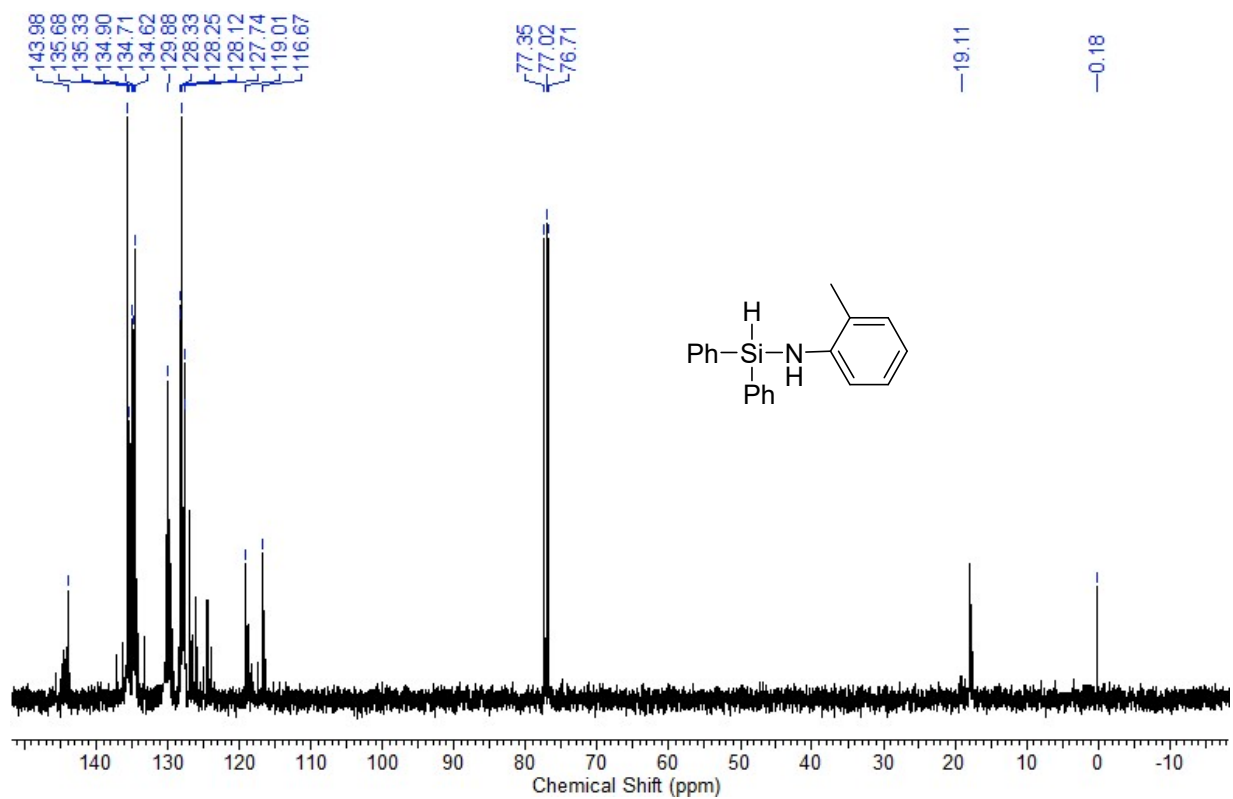

FS20. <sup>13</sup>C NMR spectrum (CDCl<sub>3</sub>, 100 MHz, 25 °C) of complex **2f**.

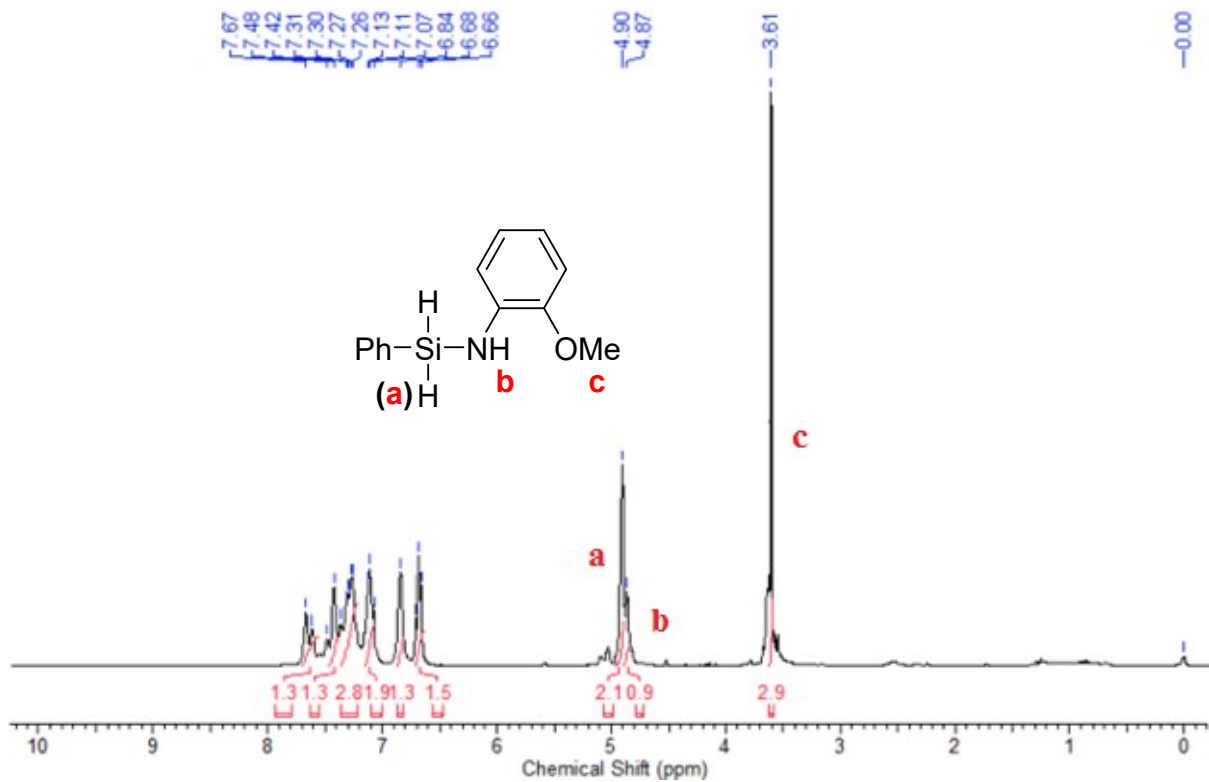

FS21. <sup>1</sup>H NMR spectrum (CDCl<sub>3</sub>, 400 MHz, 25 °C) of complex **2g**.

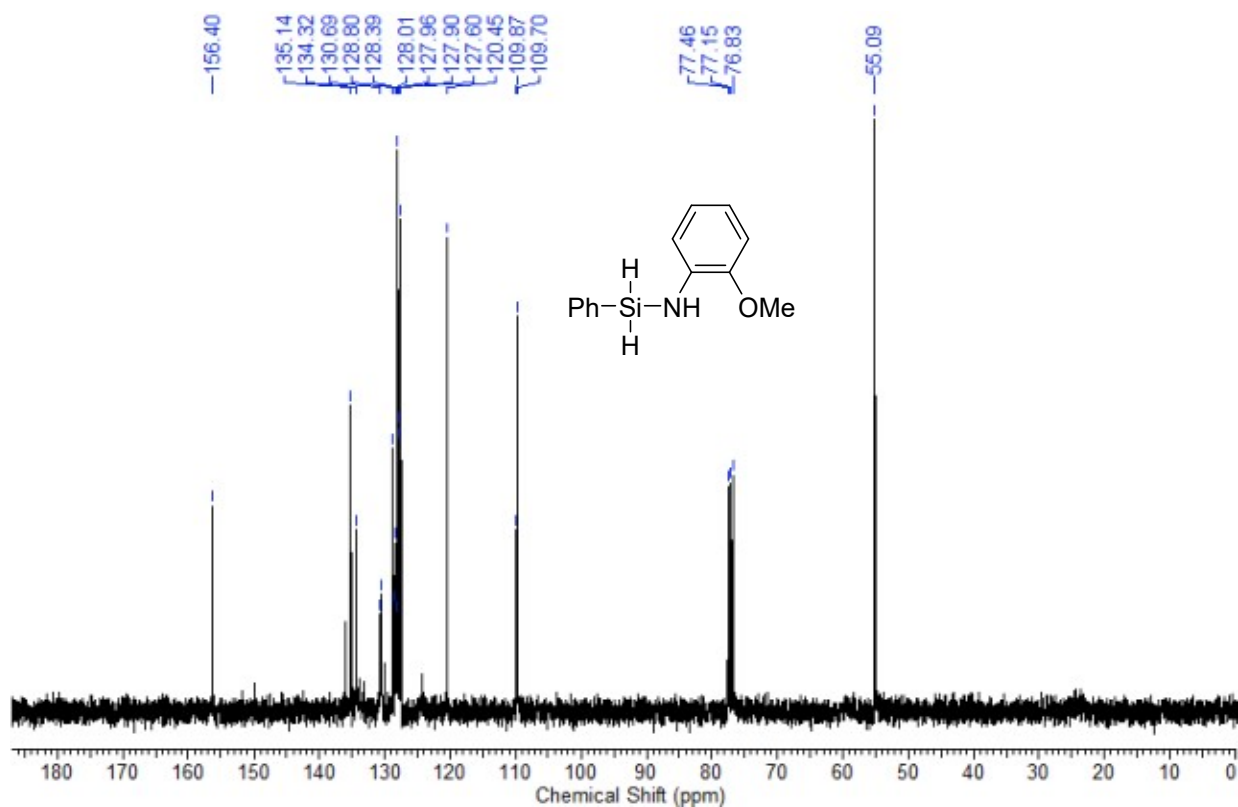

FS22.  $^{13}\text{C}$  NMR spectrum (CDCl<sub>3</sub>, 100 MHz, 25 °C) of complex **2g**.

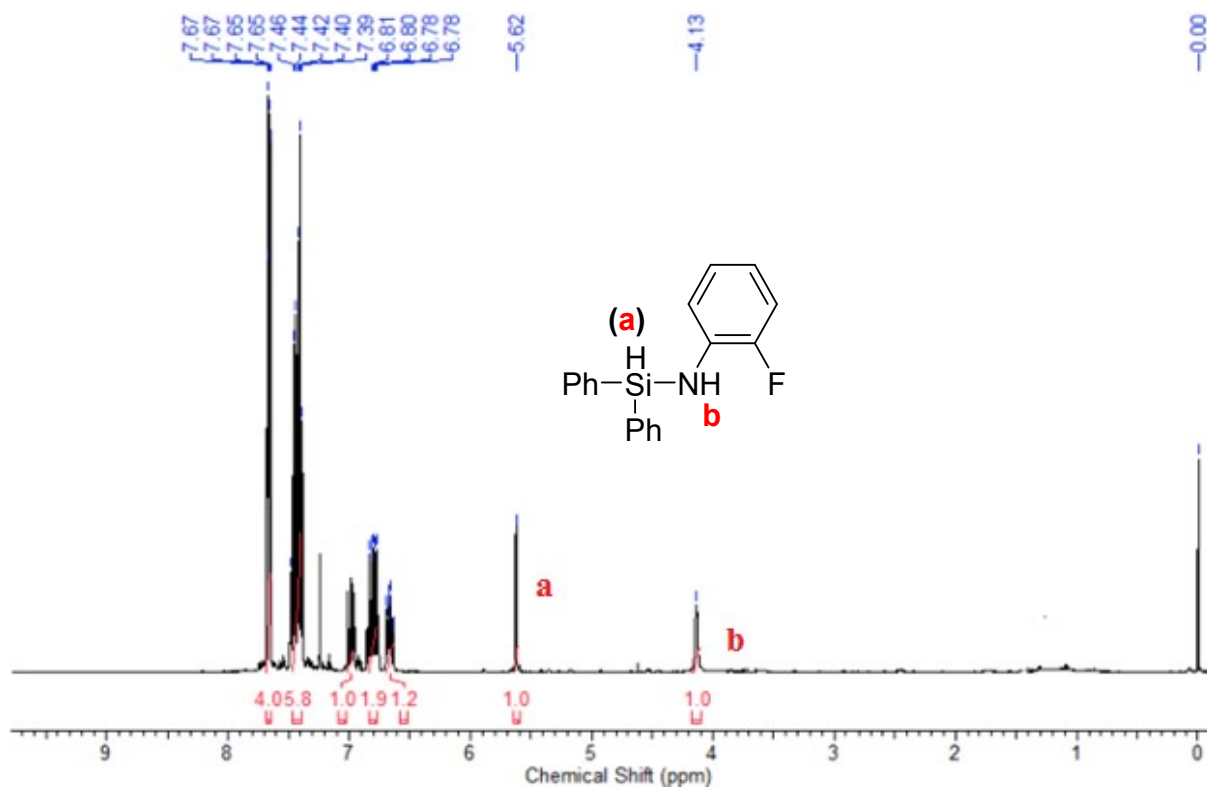

FS23.  $^1\text{H}$  NMR spectrum (CDCl<sub>3</sub>, 400 MHz, 25 °C) of complex **2h**.

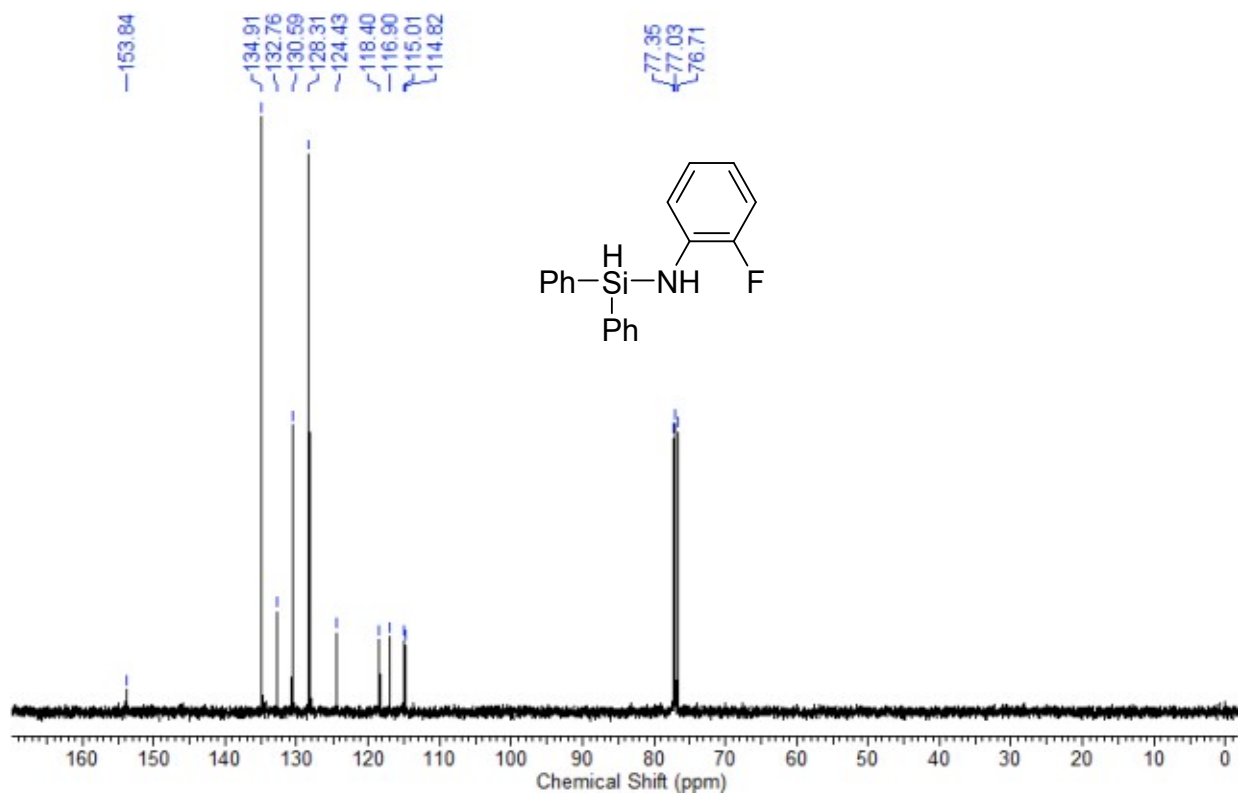

FS24.  $^{13}\text{C}$  NMR spectrum ( $\text{CDCl}_3$ , 100 MHz, 25 °C) of complex **2h**.

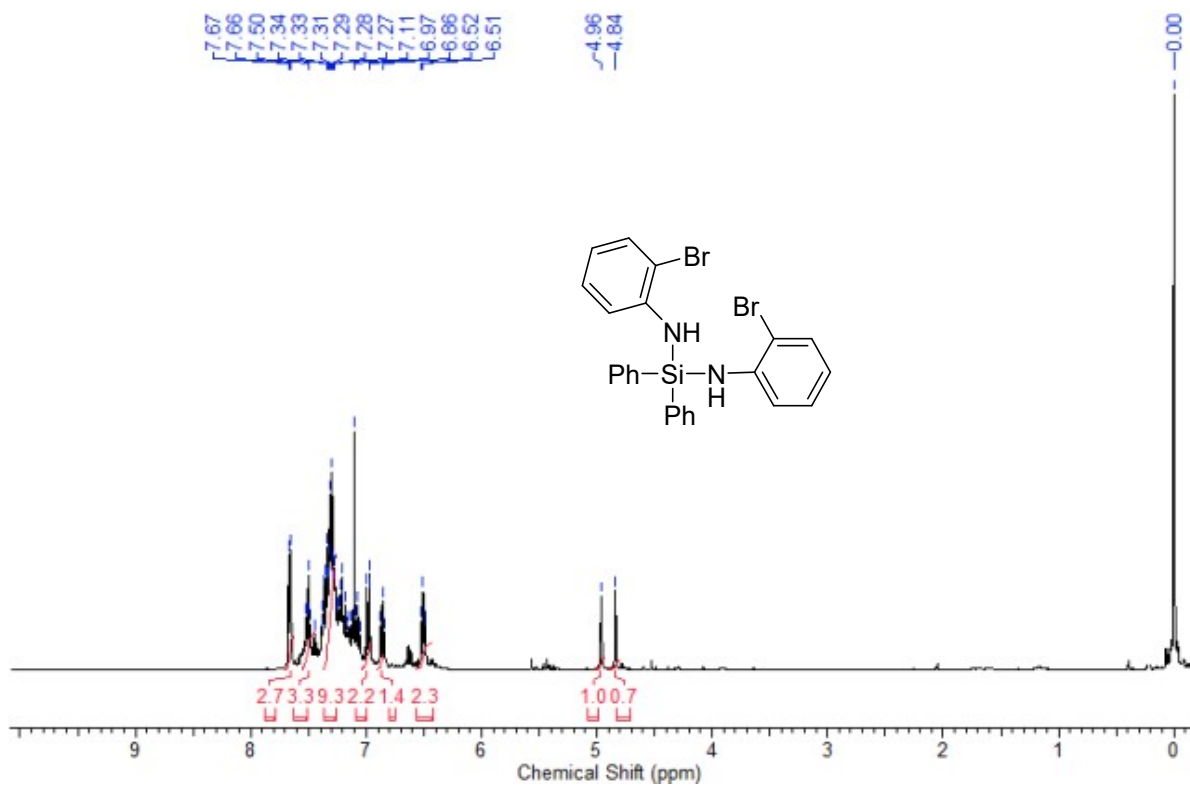

FS25.  $^1\text{H}$  NMR spectrum ( $\text{CDCl}_3$ , 400 MHz, 25 °C) of complex **2i**.



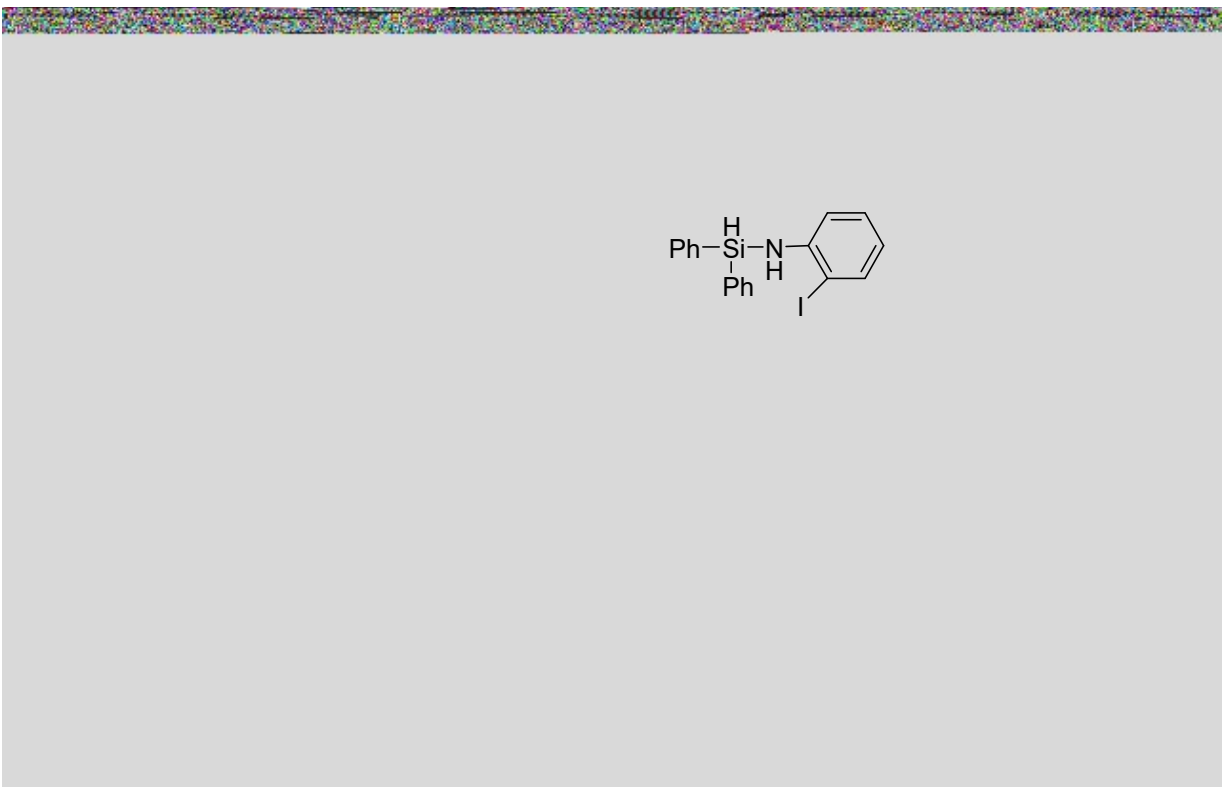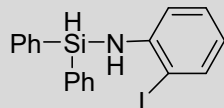

FS28.  $^{13}\text{C}$  NMR spectrum ( $\text{CDCl}_3$ , 100 MHz, 25 °C) of complex **2j**.

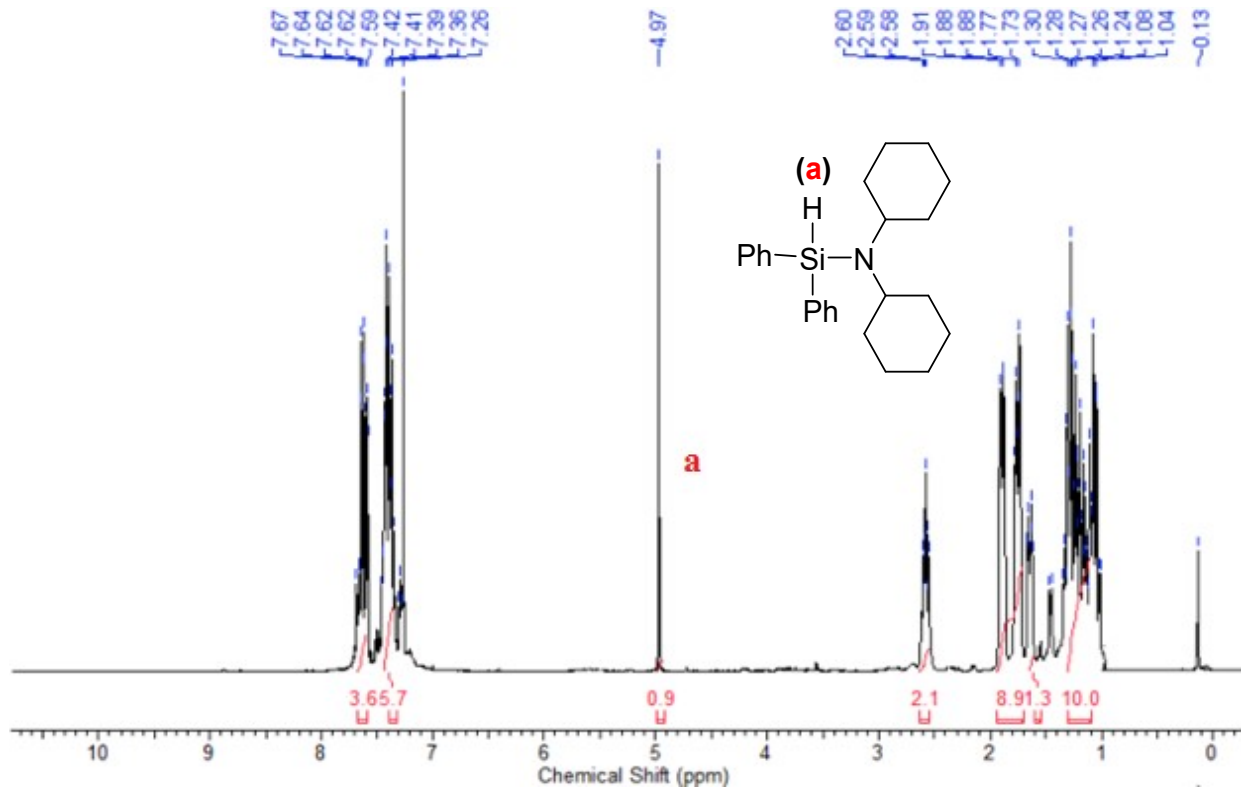

FS29.  $^1\text{H}$  NMR spectrum ( $\text{CDCl}_3$ , 400 MHz, 25 °C) of complex **2k**.



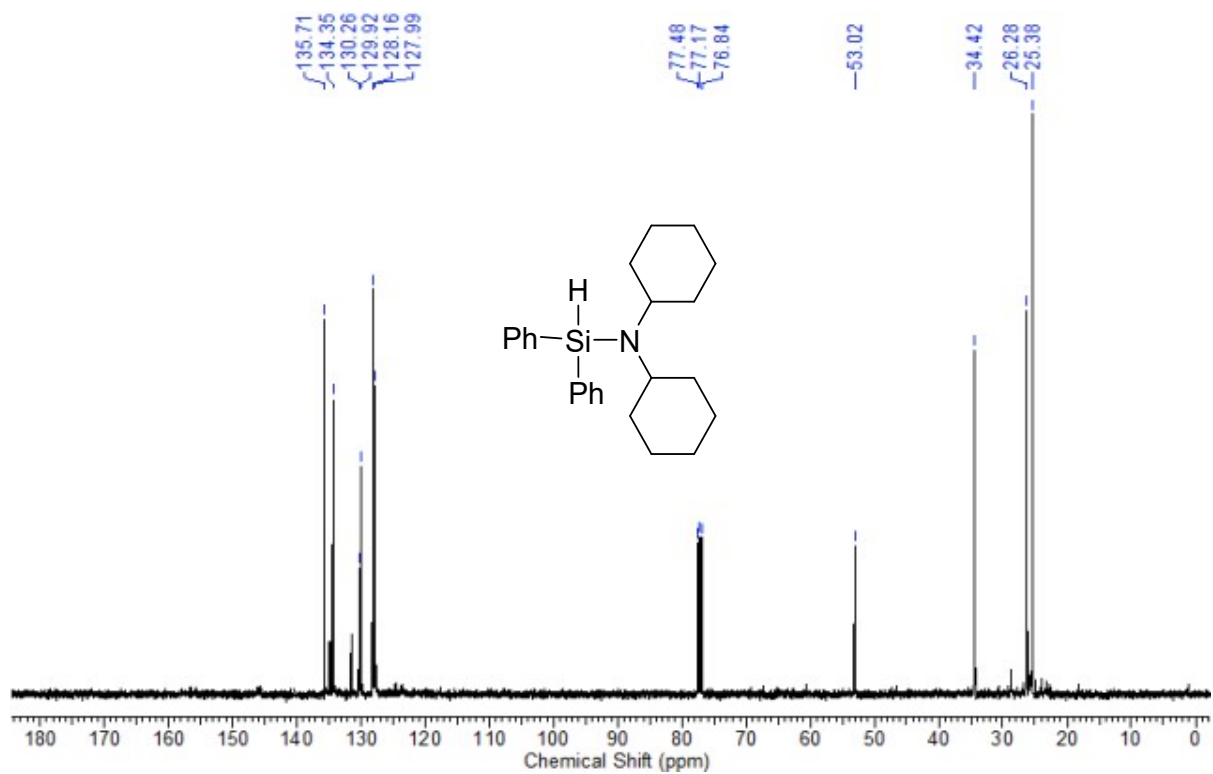

**FS30.** <sup>13</sup>C NMR spectrum (CDCl<sub>3</sub>, 100 MHz, 25 °C) of complex **2k**.

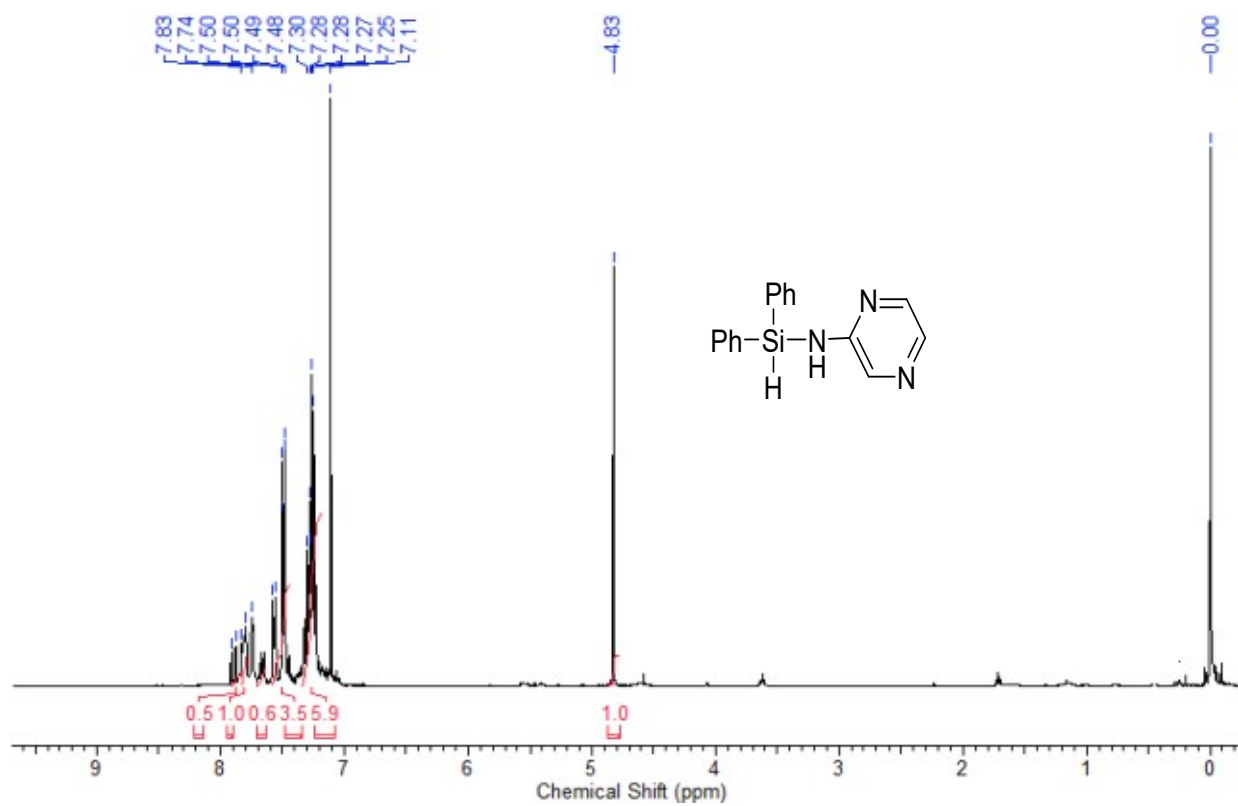

**FS31.** <sup>1</sup>H NMR spectrum (CDCl<sub>3</sub>, 400 MHz, 25 °C) of complex **2l**.

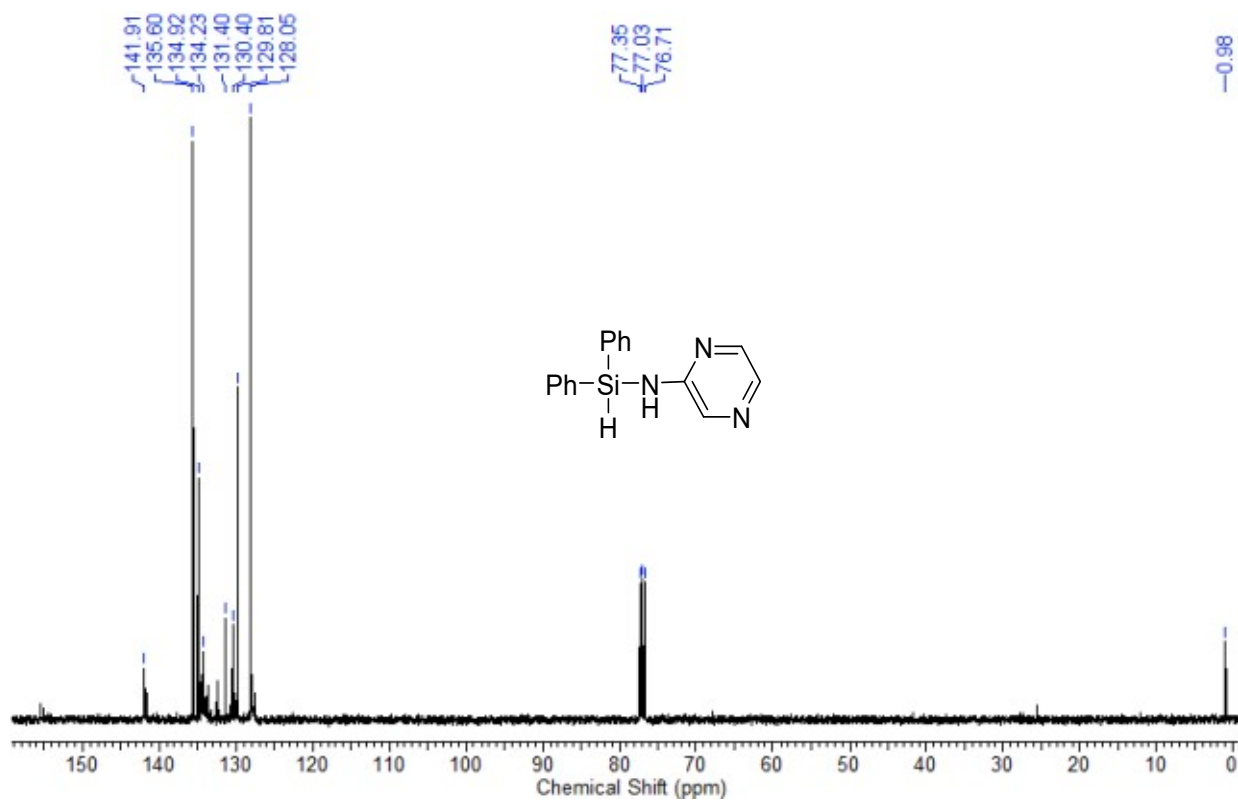

FS32. <sup>13</sup>C NMR spectrum (CDCl<sub>3</sub>, 100 MHz, 25 °C) of complex **2l**.

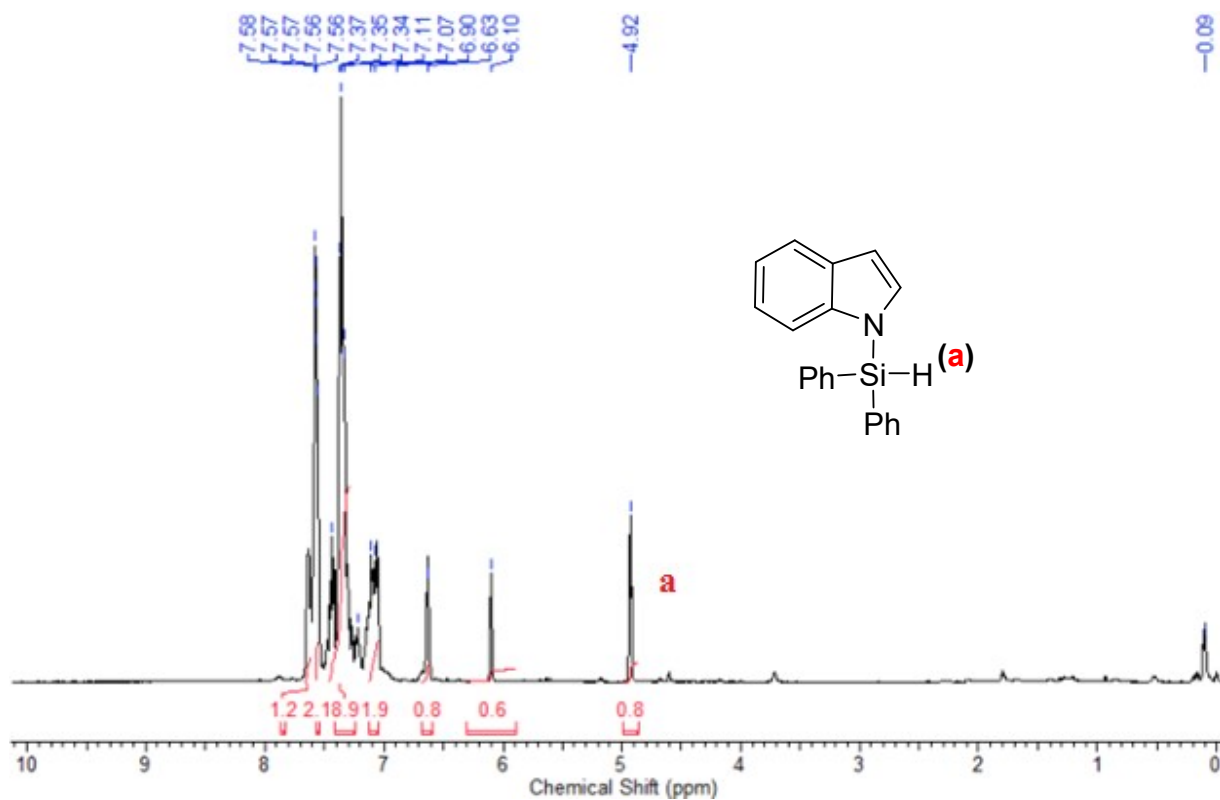

FS33. <sup>1</sup>H NMR spectrum (CDCl<sub>3</sub>, 400 MHz, 25 °C) of complex **2m**.

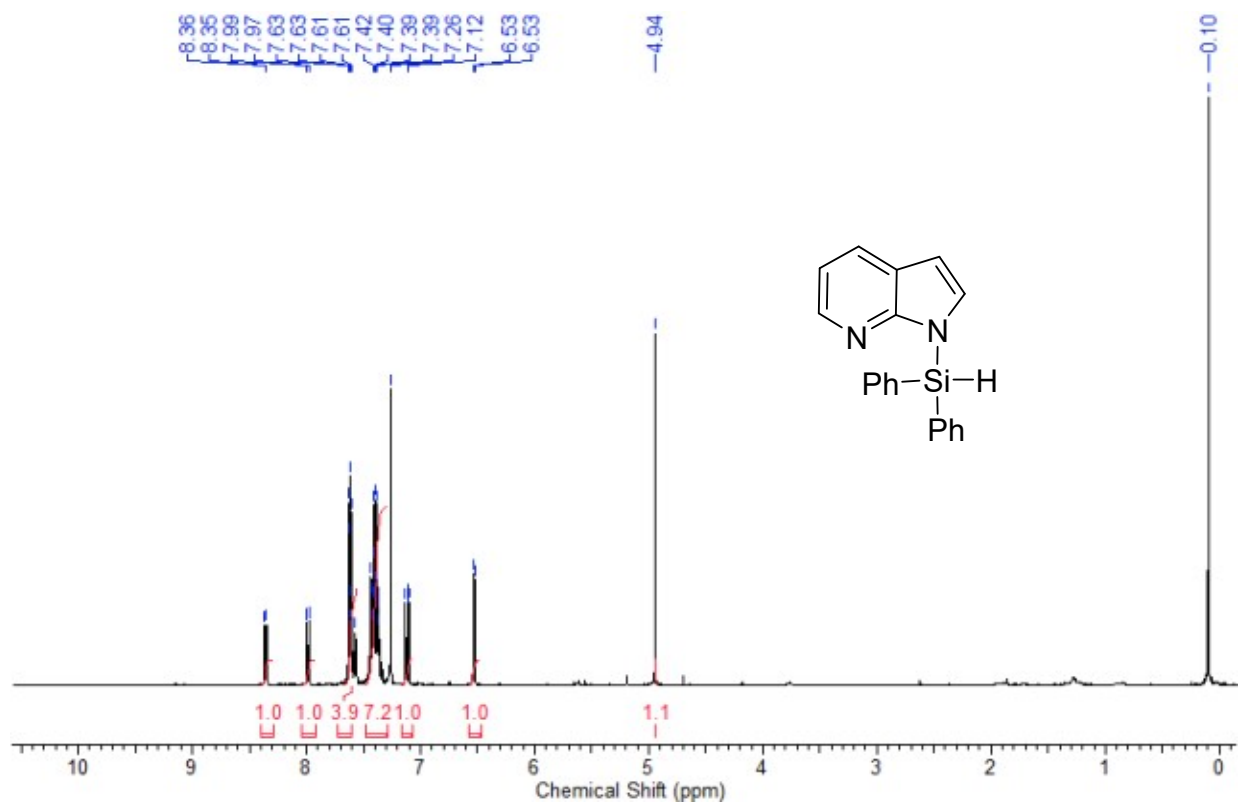

**FS34.**  $^1\text{H}$  NMR spectrum ( $\text{CDCl}_3$ , 400 MHz, 25 °C) of complex **2n**.

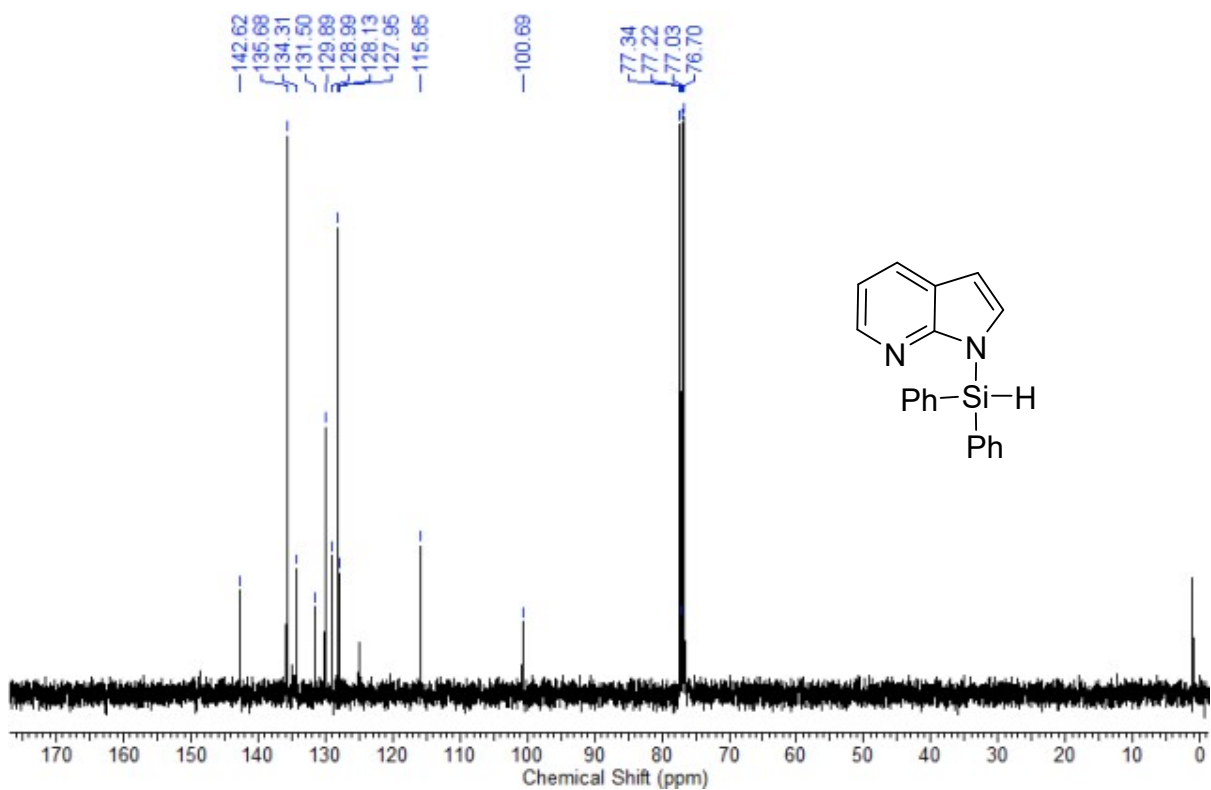

**FS35.**  $^{13}\text{C}$  NMR spectrum ( $\text{CDCl}_3$ , 100 MHz, 25 °C) of complex **2n**.

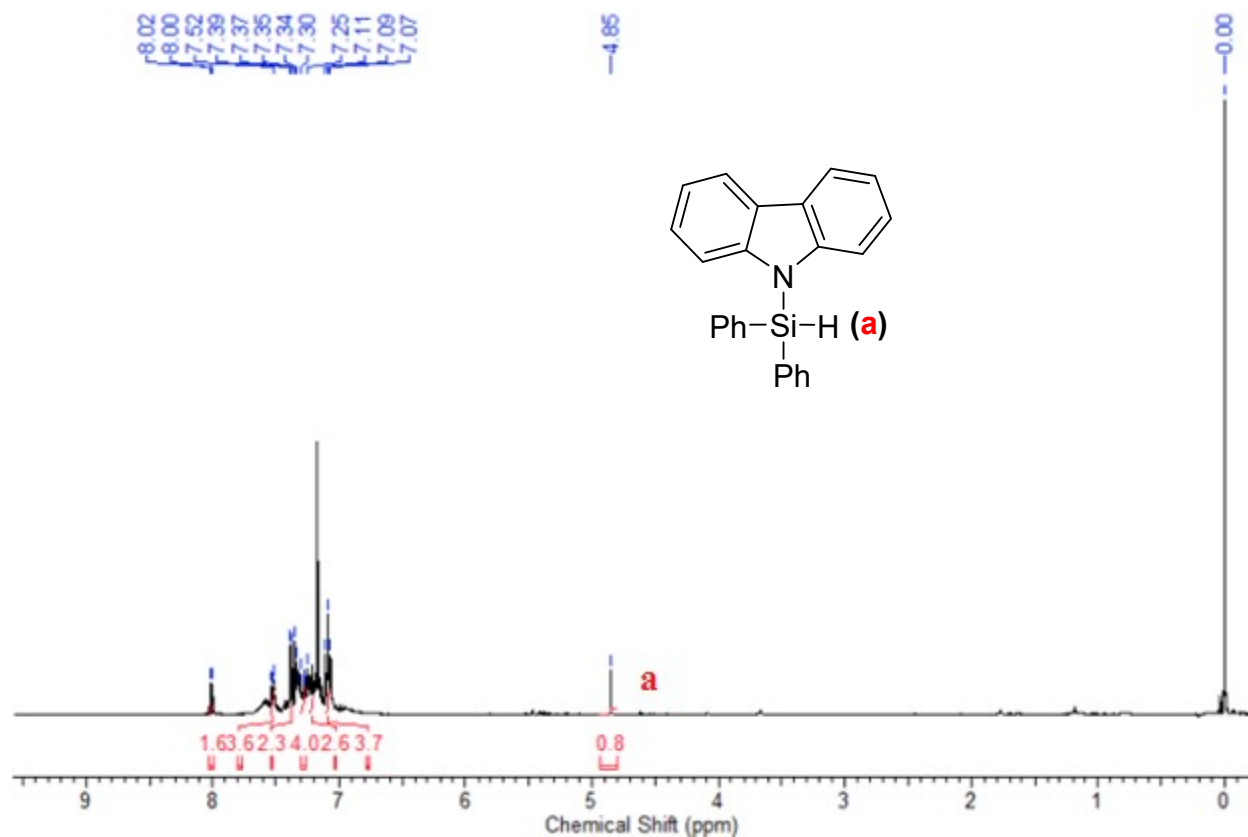

FS36.  $^1\text{H}$  NMR spectrum ( $\text{CDCl}_3$ , 400 MHz, 25  $^\circ\text{C}$ ) of complex **2o**.

### Stoichiometric reaction between Complex **3** and diphenylsilane:

$\text{Ph}_2\text{SiH}_2$  (0.5 mmol, 2 equiv) was added to a  $\text{C}_6\text{D}_6$  solution of complex **3** (0.25 mmol, 1 equiv) in a screw cap NMR tube inside the glove box. After 4 hours, the progress of the reaction was monitored by  $^1\text{H}$  NMR. Singlet peak at  $\delta = 3.90$  and 5.43 ppm correspond to N-H and Si-H proton respectively indicates for the formation of CDC product. Whereas singlet resonance at  $\delta = 3.95$  ppm indicates the formation of zinc hydride.

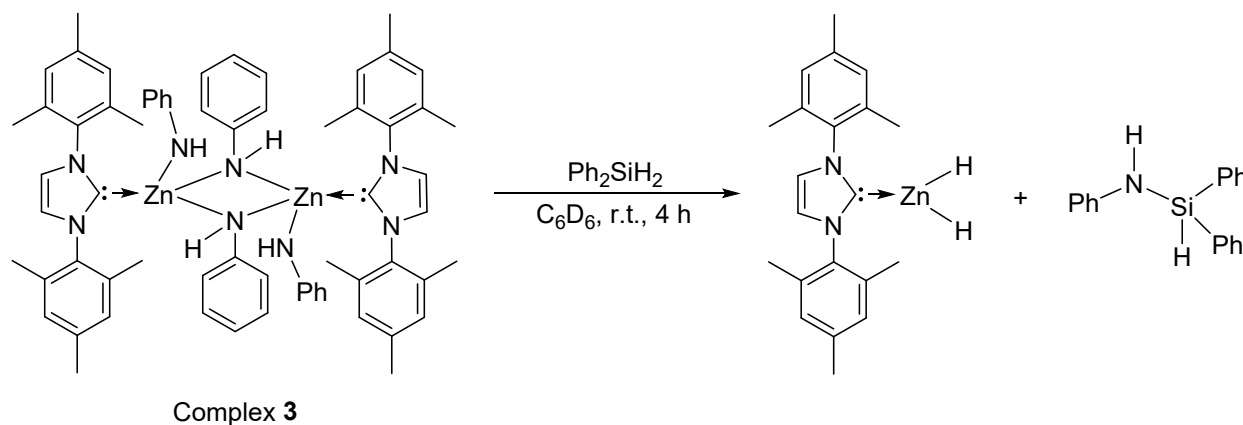

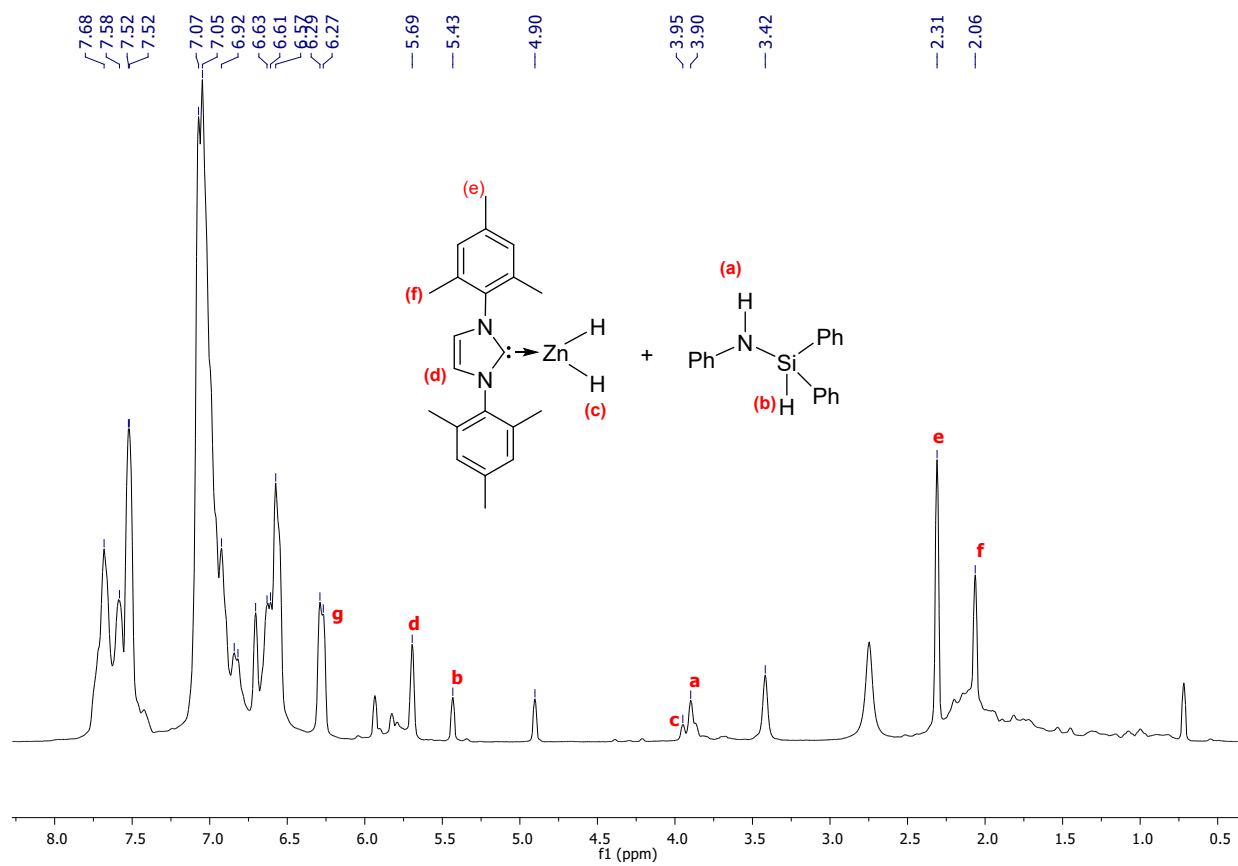

**FS37.**  $^1\text{H}$  NMR spectrum ( $\text{C}_6\text{D}_6$ , 300 MHz, 25  $^\circ\text{C}$ ) of the stoichiometric reaction between complex **3** and  $\text{Ph}_2\text{SiH}_2$ .

#### Competitive reactivity study of amine and carbonyl functionality in presence of $\text{Ph}_2\text{SiH}_2$ :

4-aminoacetophenone (0.25 mmol, 1 equiv.),  $\text{Ph}_2\text{SiH}_2$  (0.25 mmol, 1 equiv.) and NHC-Zn catalyst (2 mol %) were charged in a Schlenk tube inside the glove box. The reaction mixture was stirred for 3 hours at room temperature in neat conditions. Upon completion of the reaction, the progress of the reaction was monitored by  $^1\text{H}$  NMR with the help of mesitylene as the internal standard in  $\text{C}_6\text{D}_6$  and a mixture of products was obtained. Doublet peak at  $\delta = 6.23$  ppm ( $^1J_{\text{HH}} = 9$  Hz) for N-H proton and singlet peak at  $\delta = 5.86$  ppm for Si-H proton are the indication of the formation of only CDC product **5a** [1-(4-((diphenylsilyl)amino)phenyl)ethan-1-one] (32% product formation), whereas quartet resonance at  $\delta = 5.03$  ppm ( $^1J_{\text{HH}} = 7$  Hz) indicates the formation of another product **5b** [N-(4-(1-((diphenylsilyl)oxy)ethyl)phenyl)-1,1-diphenylsilanamine] where both amine and carbonyl group reacted with silane (68% product formation).

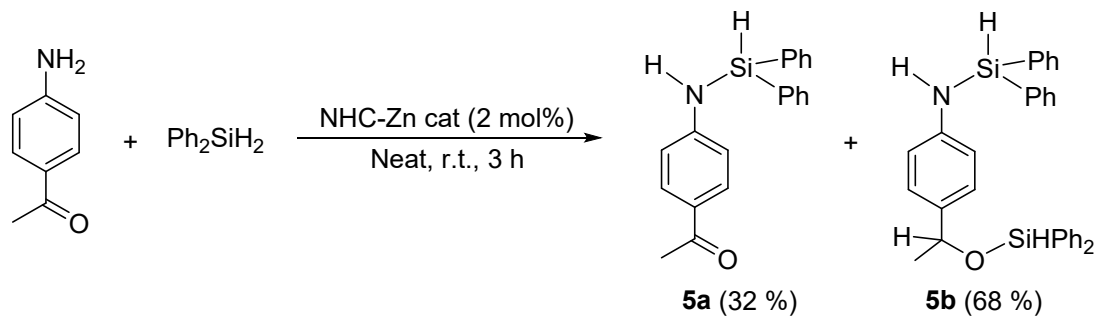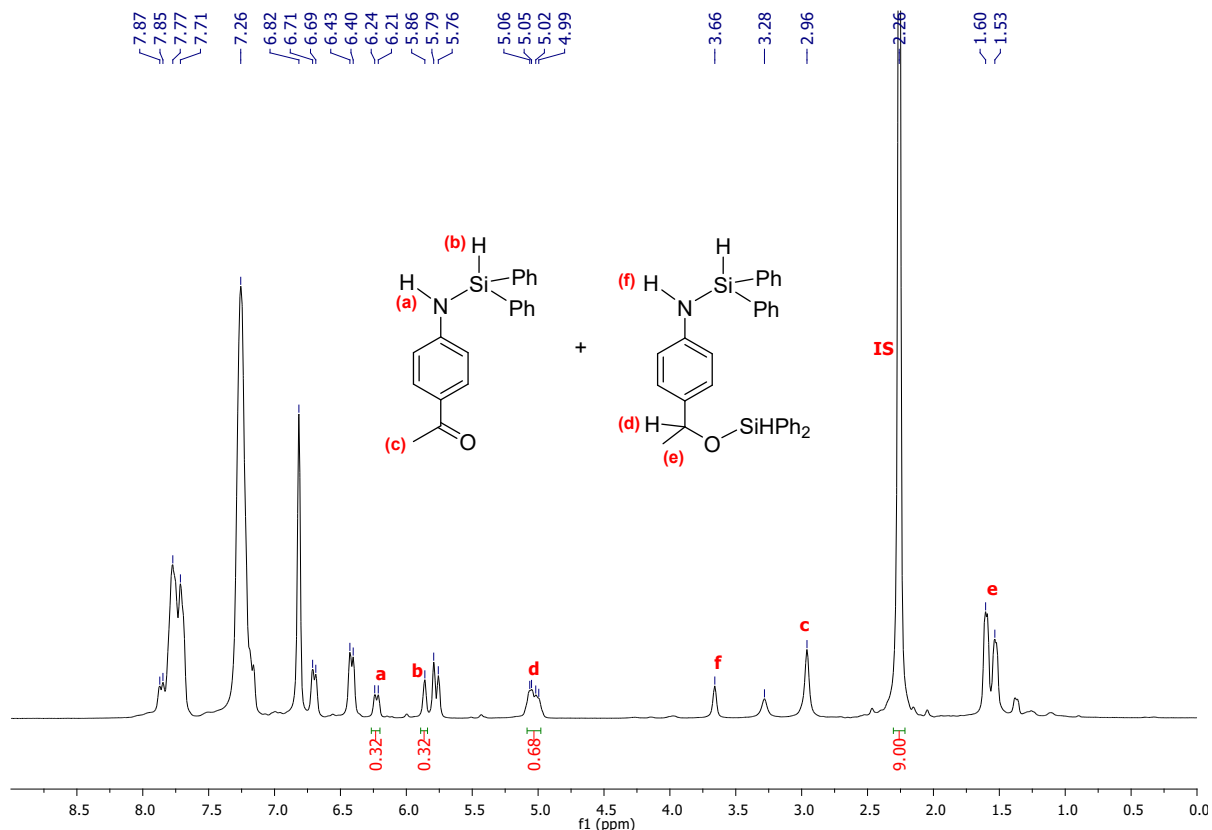

**FS38.**  $^1\text{H}$  NMR spectrum ( $\text{C}_6\text{D}_6$ , 300 MHz, 25  $^\circ\text{C}$ ) of the stoichiometric reaction between 4-aminoacetophenone and  $\text{Ph}_2\text{SiH}_2$ .

**Selective CDC reaction of amine functionality over reduction of nitrile group in presence of 1 equiv.  $\text{Ph}_2\text{SiH}_2$ :**

Aniline (0.25 mmol, 1 equiv.), 4-methylbenzonitrile (0.25 mmol, 1 equiv.),  $\text{Ph}_2\text{SiH}_2$  (0.25 mmol, 1 equiv.) and NHC-Zn catalyst (2 mol %) were charged in a Schlenk tube inside the glove box. The reaction mixture was stirred for 3 hours at room temperature in neat conditions. Upon completion of the reaction, the progress of the reaction was monitored by  $^1\text{H}$  NMR with the help of mesitylene as the internal standard in  $\text{C}_6\text{D}_6$ . Singlet peak at  $\delta = 3.68$  and 5.86 ppm correspond to N-H and Si-H proton respectively indicates for the formation of CDC product from aniline.

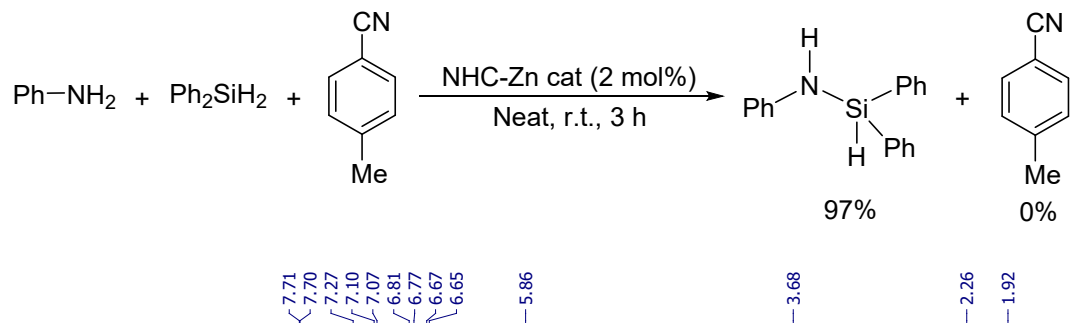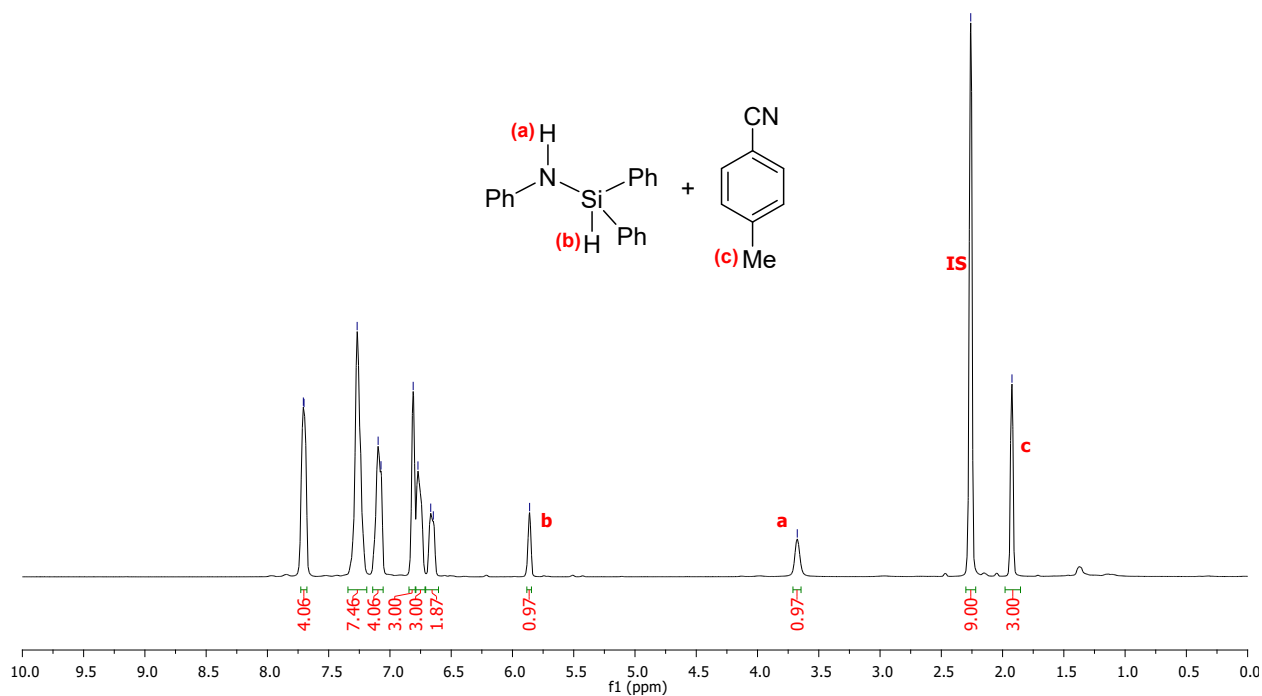

**FS39.**  $^1\text{H}$  NMR spectrum ( $\text{C}_6\text{D}_6$ , 300 MHz, 25 °C) of the reaction of aniline and 4-methylbenzonitrile in presence of one equiv.  $\text{Ph}_2\text{SiH}_2$ .

**Selective CDC reaction of amine functionality over reduction of ester group in presence of 1 equiv.  $\text{Ph}_2\text{SiH}_2$ :**

Aniline (0.25 mmol, 1 equiv.), Methyl *p*-toluate (0.25 mmol, 1 equiv.),  $\text{Ph}_2\text{SiH}_2$  (0.25 mmol, 1 equiv.) and NHC-Zn catalyst (2 mol %) were charged in a Schlenk tube inside the glove box. The reaction mixture was stirred for 3 hours at room temperature in neat conditions. Upon completion of the reaction, the progress of the reaction was monitored by  $^1\text{H}$  NMR with the help of mesitylene as the internal standard in  $\text{C}_6\text{D}_6$ . Singlet peak at  $\delta = 3.68$  and 5.87 ppm correspond to N-H and Si-H proton respectively indicates for the formation of CDC product from aniline.

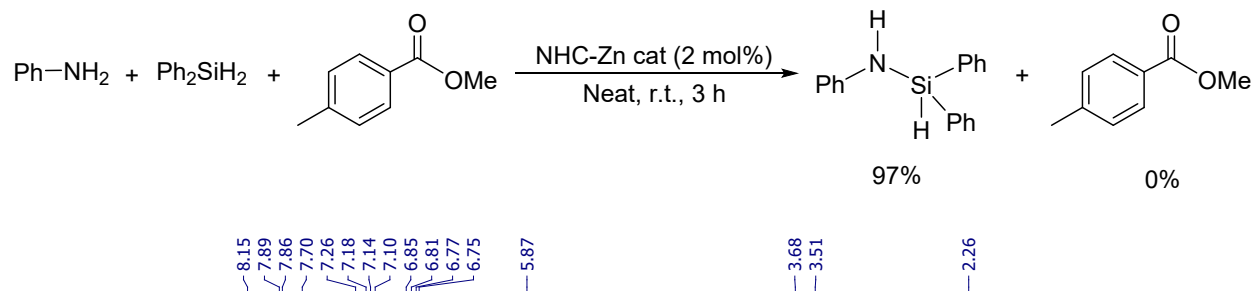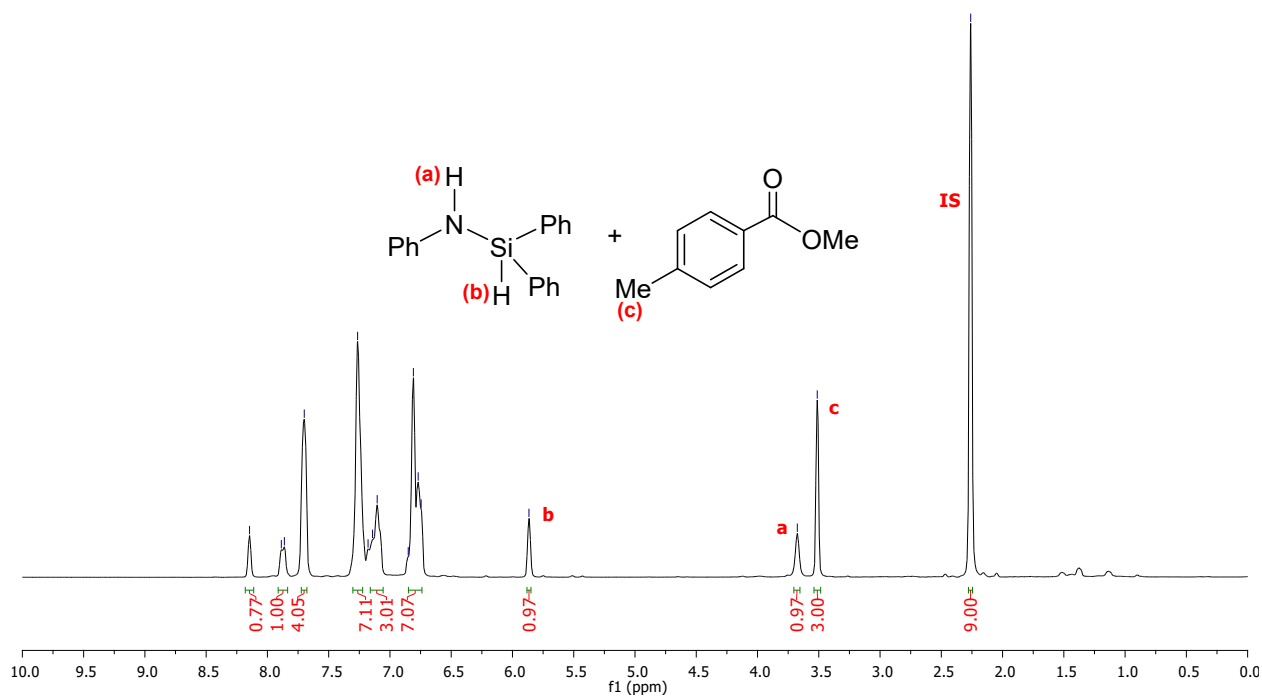

**FS40.** <sup>1</sup>H NMR spectrum (C<sub>6</sub>D<sub>6</sub>, 300 MHz, 25 °C) of the reaction of aniline and methyl *p*-toluate in presence of one equiv. Ph<sub>2</sub>SiH<sub>2</sub>.

## References

1. X. Zhang, S. Zhou, X. Fang, L. Zhang, G. Tao, Y. Wei, X. Zhu, P. Cui and S. Wang, *Inorg. Chem.*, 2020, **59**, 9683-9692.
2. M. S. Hill, D. J. Liptrot, D. J. MacDougall, M. F. Mahon and T. P. Robinson, *Chem. Sci.*, 2013, **4**, 4212-4222.
3. S. Anga, Y. Sarazin, J.-F. Carpentier and T. K. Panda, *ChemCatChem*, 2016, **8**, 1373-1378.
4. D. Gasperini, A. K. King, N. T. Coles, M. F. Mahon and R. L. Webster, *ACS Catal.*, 2020, **10**, 6102-6112.
5. A. Baishya, T. Peddarao and S. Nembenna, *Dalton Trans.*, 2017, **46**, 5880-5887.
6. C. Bellini, J.-F. Carpentier, S. Tobisch and Y. Sarazin, *Angew. Chem.*, 2015, **127**, 7789-7793.
7. J. F. Dunne, S. R. Neal, J. Engelkemier, A. Ellern and A. D. Sadow, *J. Am. Chem. Soc.*, 2011, **133**, 16782-16785.
8. W. Xie, H. Hu and C. Cui, *Angew. Chem.*, 2012, **124**, 11303-11306.
